# Supplementary material for: Combined transcriptomics and proteomics forecast analysis for potential biomarker in the acute phase of temporal lobe epilepsy
Source: Front Neurosci. 2023 Mar 30;17:1145805. doi: 10.3389/fnins.2023.1145805 (PMC10097945; doi:10.3389/fnins.2023.1145805)
Supplement: Supplementary file 2 [file Data_Sheet_2.XLSX]

## Sheet: diff
id	logFC	AveExpr	t	P.Value	adj.P.Val	B
Lrrn2	-1.6022	7.88862	-32.2551	7.86783e-18	1.69237e-13	30.2404
Adamts1	2.43937	9.13001	28.5736	7.23899e-17	7.78554e-13	28.3313
Cgref1	2.64962	7.11255	24.1248	1.57398e-15	1.12854e-11	25.5587
Bdnf	2.33113	9.66748	22.8643	4.1539e-15	2.23376e-11	24.6597
Rnf128	1.45136	8.91053	21.9506	8.66484e-15	3.26119e-11	23.9715
Nfil3	3.32557	7.6176	21.8512	9.40185e-15	3.26119e-11	23.8947
Gadd45g	3.52095	9.43232	21.5771	1.17989e-14	3.26119e-11	23.6808
Scg2	1.74137	11.6457	21.544	1.2129e-14	3.26119e-11	23.6548
Myc	1.09493	6.43298	21.3576	1.41799e-14	3.38899e-11	23.5072
Srxn1	1.64052	8.08845	20.8542	2.17569e-14	4.14994e-11	23.1018
Ptgs2	3.23121	9.0682	20.7856	2.30814e-14	4.14994e-11	23.0456
Ifrd1	1.90472	9.64295	20.7821	2.31517e-14	4.14994e-11	23.0428
Sult2b1	2.41969	8.01913	20.6091	2.68931e-14	4.44978e-11	22.9004
Zfp40	-0.926599	5.87065	-20.3086	3.49844e-14	5.21885e-11	22.6498
Nptx2	3.13065	8.10788	20.2004	3.84931e-14	5.21885e-11	22.5586
Tpm4	1.56207	8.73614	20.0958	4.22376e-14	5.21885e-11	22.47
Snhg1	1.44932	7.56449	20.0402	4.43813e-14	5.21885e-11	22.4227
Dagla	-1.2762	9.05083	-20.0044	4.58238e-14	5.21885e-11	22.3921
Smad7	1.41205	7.80943	19.9977	4.60987e-14	5.21885e-11	22.3864
Inhba	1.64873	6.07091	19.9046	5.0109e-14	5.22553e-11	22.3066
Sowahb	2.32449	7.70898	19.8833	5.10771e-14	5.22553e-11	22.2883
Pald1	1.71647	6.90037	19.8329	5.34457e-14	5.22553e-11	22.2449
Cyr61	2.69293	5.74828	19.6873	6.096e-14	5.70109e-11	22.1188
Sap30	1.76057	8.42428	19.5131	7.1433e-14	6.40218e-11	21.9667
Kcnf1	1.71037	7.36458	19.1501	9.98233e-14	8.42851e-11	21.645
Bag3	2.54417	8.07924	19.0906	1.0551e-13	8.42851e-11	21.5916
Gucy1b3	-0.924836	9.50168	-19.0877	1.05797e-13	8.42851e-11	21.589
Frmd6	1.76832	7.9355	18.9838	1.16584e-13	8.68462e-11	21.4954
Zfp36	2.10522	7.49322	18.9792	1.17087e-13	8.68462e-11	21.4912
Cd14	2.86172	8.64708	18.8502	1.32187e-13	9.47783e-11	21.3742
Npas4	5.12857	8.14922	18.6476	1.60173e-13	1.10351e-10	21.1887
Mcl1	1.29411	9.27564	18.594	1.6858e-13	1.10351e-10	21.1392
Sertad1	1.70562	7.85904	18.5895	1.69297e-13	1.10351e-10	21.1351
Syt4	1.57853	9.80696	18.4974	1.84911e-13	1.16983e-10	21.0498
Fbl	0.916917	9.15996	18.4341	1.96506e-13	1.19179e-10	20.9909
Neurod6	-2.04992	9.76442	-18.418	1.9957e-13	1.19179e-10	20.9759
Arpp21	1.33381	8.32612	18.3901	2.05003e-13	1.19179e-10	20.9499
Nr3c2	-1.14348	9.10036	-18.2567	2.33243e-13	1.32028e-10	20.8248
Fosl2	2.1798	8.18104	18.1942	2.47876e-13	1.36713e-10	20.7658
Trib1	1.09619	5.36346	18.0109	2.96528e-13	1.59458e-10	20.5918
Rela	0.849278	8.47343	17.9703	3.08611e-13	1.61908e-10	20.553
Atf3	4.57044	8.12032	17.8082	3.62258e-13	1.85528e-10	20.3971
Aff1	0.770948	5.51471	17.7383	3.88354e-13	1.94267e-10	20.3294
Odc1	1.8383	9.63617	17.6538	4.22527e-13	2.06558e-10	20.2473
Sbno2	1.36933	6.15758	17.5686	4.60224e-13	2.17217e-10	20.164
C1ql2	-1.49093	8.74462	-17.5593	4.64528e-13	2.17217e-10	20.1549
Lct	-3.05588	7.12115	-17.4583	5.14286e-13	2.35368e-10	20.0557
Klf6	1.36899	6.4043	17.4348	5.2664e-13	2.36e-10	20.0325
Gadd45b	1.97446	7.31461	17.4077	5.41317e-13	2.37627e-10	20.0057
Csrnp1	1.14426	6.31634	17.3295	5.8603e-13	2.47241e-10	19.9282
Edn1	1.86338	6.33166	17.3292	5.86206e-13	2.47241e-10	19.9279
Gm15210	0.837733	9.62631	17.1685	6.9079e-13	2.85748e-10	19.7675
Nos3	1.14079	6.73363	17.0189	8.05746e-13	3.27011e-10	19.6169
G530011O06Rik	2.48762	7.60215	16.9148	8.97571e-13	3.46282e-10	19.5113
Areg	3.56306	4.88573	16.9142	8.98099e-13	3.46282e-10	19.5107
Pla1a	1.16067	6.0151	16.9106	9.01526e-13	3.46282e-10	19.507
Srgn	1.71668	9.25556	16.7623	1.05232e-12	3.92698e-10	19.3554
Sat1	1.32562	9.31181	16.7539	1.06172e-12	3.92698e-10	19.3467
Nrip2	-0.907516	7.12695	-16.7248	1.0946e-12	3.92698e-10	19.3168
Chrm1	-0.901628	8.24405	-16.7241	1.09539e-12	3.92698e-10	19.3161
Slc3a2	0.83212	10.5408	16.6713	1.15788e-12	4.08295e-10	19.2616
Arid5a	1.17472	7.03102	16.5937	1.25666e-12	4.35981e-10	19.1813
Adm	1.25316	5.99967	16.4853	1.40964e-12	4.81291e-10	19.0685
Fgl2	2.03509	4.96733	16.4618	1.44535e-12	4.85772e-10	19.0439
Dclk3	-1.6719	6.2585	-16.3656	1.60154e-12	5.29985e-10	18.9431
Cdk11b	0.881757	9.51946	16.3482	1.63168e-12	5.31779e-10	18.9247
Lrrn3	-0.818154	8.42377	-16.3253	1.67228e-12	5.36875e-10	18.9006
Rnft1	0.80113	6.53302	16.2922	1.73266e-12	5.48081e-10	18.8657
Zkscan16	-1.50428	8.18396	-16.2593	1.79497e-12	5.59562e-10	18.8309
C230007H23Rik	1.67207	6.32211	16.1812	1.95283e-12	5.96972e-10	18.7479
Zfp275	1.02814	8.26473	16.1728	1.97048e-12	5.96972e-10	18.7391
Egr2	3.63564	5.27341	16.145	2.03063e-12	6.06652e-10	18.7095
Mblac2	-0.869254	6.81967	-16.0901	2.1552e-12	6.35047e-10	18.6508
Dusp4	1.76242	8.35195	16.0602	2.22649e-12	6.47187e-10	18.6188
Fam131a	-0.961634	9.33156	-16.0013	2.37401e-12	6.80865e-10	18.5556
Elovl1	0.8666	6.92728	15.9412	2.53511e-12	7.09169e-10	18.4908
3930401B19Rik	2.74466	9.05702	15.9399	2.53863e-12	7.09169e-10	18.4895
Ccl11	1.92891	4.01194	15.8437	2.82148e-12	7.78077e-10	18.3853
Socs3	2.88782	7.88421	15.816	2.90874e-12	7.91988e-10	18.3552
Ptpn12	1.20895	8.70894	15.7945	2.97854e-12	7.98757e-10	18.3318
Plxna1	-0.845934	6.36486	-15.7856	3.00787e-12	7.98757e-10	18.3221
Swap70	0.83361	6.46784	15.7336	3.18605e-12	8.30009e-10	18.2653
Rai14	1.04134	5.42176	15.7289	3.20273e-12	8.30009e-10	18.2602
2900072G11Rik	-1.23349	5.19914	-15.7148	3.25297e-12	8.32993e-10	18.2448
Cd93	0.950668	5.3088	15.6629	3.44595e-12	8.72027e-10	18.1879
Litaf	1.26228	8.59397	15.5908	3.73422e-12	9.33989e-10	18.1085
Procr	2.11151	5.36141	15.5523	3.89833e-12	9.6383e-10	18.066
Myo1c	0.797372	6.19108	15.5227	4.02955e-12	9.84951e-10	18.0333
Plaur	1.75932	6.65996	15.4863	4.1975e-12	1.00608e-09	17.9929
Acan	3.2577	7.52763	15.4837	4.20952e-12	1.00608e-09	17.99
Ccl2	2.37422	6.83571	15.451	4.3671e-12	1.03227e-09	17.9537
Clic4	1.2209	9.51369	15.3757	4.75406e-12	1.11152e-09	17.8697
Maff	2.36723	6.294	15.323	5.04586e-12	1.16037e-09	17.8107
Tia1	-0.72451	7.52932	-15.3186	5.07089e-12	1.16037e-09	17.8058
Nedd9	1.52623	5.86107	15.2042	5.77508e-12	1.3076e-09	17.677
Tmbim1	1.32863	8.73766	15.1925	5.8528e-12	1.31139e-09	17.6638
Thbs1	2.4204	5.47239	15.1206	6.35456e-12	1.40131e-09	17.5823
Shc4	1.08938	6.50088	15.1064	6.45891e-12	1.40335e-09	17.5661
Snord104	0.765322	7.56733	15.0807	6.6523e-12	1.41552e-09	17.5369
Arf6	0.629064	7.08233	15.0738	6.70452e-12	1.41552e-09	17.5291
Tram1l1	-0.915042	7.97246	-15.0728	6.71238e-12	1.41552e-09	17.528
2410006H16Rik	1.02062	8.88137	15.042	6.95452e-12	1.45235e-09	17.4928
Rfwd2	1.05895	9.98822	15.0104	7.2123e-12	1.4917e-09	17.4567
Rai2	1.28419	5.60533	14.9531	7.70571e-12	1.57857e-09	17.3911
Stmn4	0.888084	11.1586	14.9217	7.99143e-12	1.60707e-09	17.3549
Chst12	-1.20151	6.63393	-14.9214	7.99426e-12	1.60707e-09	17.3546
Arhgef2	-0.867201	7.70224	-14.8867	8.32196e-12	1.64677e-09	17.3147
Calu	0.665776	7.3289	14.8844	8.34484e-12	1.64677e-09	17.312
Magoh	1.5813	9.90758	14.8397	8.78945e-12	1.71874e-09	17.2604
Pcdh8	1.53822	11.3196	14.7994	9.21223e-12	1.78412e-09	17.2138
Pde4d	0.714982	8.12475	14.7922	9.28968e-12	1.78412e-09	17.2055
Cited2	1.80316	8.46624	14.7067	1.02679e-11	1.94215e-09	17.106
Rwdd4a	0.875759	8.50935	14.6951	1.04087e-11	1.94215e-09	17.0925
Adgrb3	-1.00762	9.2413	-14.6911	1.04572e-11	1.94215e-09	17.0878
St6galnac5	-0.903378	9.85265	-14.6837	1.05481e-11	1.94215e-09	17.0792
Baz1a	1.68455	5.08961	14.6704	1.07152e-11	1.94805e-09	17.0636
Ier3	1.67217	7.63035	14.6655	1.07772e-11	1.94805e-09	17.0579
Grrp1	0.874185	6.6826	14.6559	1.08987e-11	1.9536e-09	17.0467
Fbxo21	-0.784099	8.36732	-14.6289	1.12512e-11	2.00011e-09	17.0151
Pvr	1.29363	5.82166	14.6029	1.1601e-11	2.04538e-09	16.9846
A730054J21Rik	-1.17587	5.46824	-14.5954	1.17048e-11	2.04691e-09	16.9758
Bcl3	1.50344	5.8533	14.5828	1.18801e-11	2.06081e-09	16.961
Pgbd5	-0.832089	10.0539	-14.5307	1.26355e-11	2.17432e-09	16.8997
Xkr4	-0.852389	7.69656	-14.4834	1.33648e-11	2.28157e-09	16.8438
Zkscan4	-0.895084	6.03018	-14.4682	1.36099e-11	2.3051e-09	16.8258
Dhx33	-1.00423	7.55333	-14.4384	1.41009e-11	2.36961e-09	16.7905
Arhgap20	-1.13802	7.31624	-14.4105	1.45781e-11	2.41906e-09	16.7574
D630004K10Rik	-0.731143	8.04263	-14.4081	1.46201e-11	2.41906e-09	16.7545
Gm20186	2.40836	9.18686	14.3817	1.50883e-11	2.47748e-09	16.7231
Mir22hg	0.947855	8.91271	14.3442	1.57814e-11	2.55388e-09	16.6784
Rhoc	1.16416	7.56458	14.3436	1.57911e-11	2.55388e-09	16.6778
Fam46a	1.56798	6.49012	14.2894	1.68538e-11	2.68538e-09	16.6129
Stx11	0.820875	4.11864	14.2818	1.70088e-11	2.69015e-09	16.6038
Naf1	1.2333	9.0174	14.2725	1.71989e-11	2.69482e-09	16.5927
Limd2	-0.826213	7.03981	-14.2682	1.72889e-11	2.69482e-09	16.5875
A430033K04Rik	-0.686259	5.45384	-14.2549	1.75674e-11	2.71853e-09	16.5716
Ell2	0.767064	6.35681	14.1902	1.89946e-11	2.91838e-09	16.4937
LOC102641080	1.12902	5.96568	14.1802	1.92255e-11	2.93291e-09	16.4817
Nfkb1	0.77441	8.04524	14.172	1.94182e-11	2.94144e-09	16.4717
Ier2	1.78235	7.64553	14.1615	1.96654e-11	2.95807e-09	16.4591
Nxph1	-1.18269	5.46373	-14.1073	2.10025e-11	3.13725e-09	16.3935
Pttg1ip	0.754005	7.36244	14.0363	2.28996e-11	3.38412e-09	16.3073
Tjp2	0.726337	7.6212	13.9833	2.44302e-11	3.57478e-09	16.2427
St6gal2	-1.38852	6.18834	-13.9086	2.67747e-11	3.89138e-09	16.1512
Gpr84	1.46812	6.97083	13.8944	2.72472e-11	3.93347e-09	16.1338
C5ar1	1.21067	5.38107	13.8601	2.84242e-11	4.07603e-09	16.0915
Dmxl1	1.31098	8.83197	13.8498	2.8788e-11	4.09221e-09	16.0788
Ch25h	1.9853	7.11004	13.8443	2.89845e-11	4.09221e-09	16.072
Midn	0.896336	7.68938	13.8408	2.91078e-11	4.09221e-09	16.0678
Hspa1a	3.79692	10.107	13.8287	2.9547e-11	4.12699e-09	16.0528
Hmox1	2.3414	7.89376	13.809	3.02769e-11	4.20165e-09	16.0285
Cdkn1a	2.22076	7.88522	13.7908	3.09638e-11	4.26943e-09	16.006
Tsc22d2	1.21221	7.53313	13.7515	3.25089e-11	4.45393e-09	15.9574
Hmgb2	1.21112	5.60162	13.7293	3.34216e-11	4.54999e-09	15.9297
Atp2b2	-1.00382	8.73133	-13.7186	3.38672e-11	4.58166e-09	15.9165
A930041H05Rik	-0.899061	6.62359	-13.7133	3.40915e-11	4.58317e-09	15.9099
Fndc9	3.05231	6.89719	13.6929	3.49691e-11	4.65947e-09	15.8845
Avpi1	0.73557	7.54086	13.688	3.51809e-11	4.65947e-09	15.8784
Crbn	-0.647601	8.55366	-13.6806	3.55097e-11	4.65947e-09	15.8691
Cdh8	-1.10669	5.94885	-13.6802	3.55255e-11	4.65947e-09	15.8687
Yap1	0.754472	6.76286	13.6259	3.80191e-11	4.94275e-09	15.8009
Tubgcp2	-0.674106	8.05206	-13.6232	3.81449e-11	4.94275e-09	15.7976
Rdh10	0.893012	7.28671	13.5672	4.09192e-11	5.27049e-09	15.7273
Smyd4	1.65917	7.63952	13.5394	4.2372e-11	5.39302e-09	15.6924
Rgs2	1.65378	8.13424	13.5335	4.26877e-11	5.40125e-09	15.685
Zwint	1.06014	7.1958	13.4944	4.48427e-11	5.62634e-09	15.6357
Lsm8	-0.609174	7.56561	-13.4918	4.49898e-11	5.62634e-09	15.6324
Fos	3.95735	10.0734	13.4703	4.62286e-11	5.72482e-09	15.6053
Ctnna1	0.701647	6.51859	13.4686	4.63263e-11	5.72482e-09	15.6031
Gramd1b	0.82777	7.93785	13.4644	4.65757e-11	5.72482e-09	15.5978
Stk40	1.40308	8.29308	13.4221	4.91343e-11	5.95763e-09	15.5442
Vstm2a	-1.21487	9.18476	-13.42	4.9267e-11	5.95763e-09	15.5415
Arc	3.06221	9.84147	13.4171	4.94445e-11	5.95763e-09	15.5379
Dlgap1	-0.715788	7.9577	-13.4125	4.97365e-11	5.95763e-09	15.532
Lcn2	2.11216	8.64202	13.4106	4.98547e-11	5.95763e-09	15.5297
Tfpi2	1.85771	4.15834	13.3783	5.19401e-11	6.15319e-09	15.4886
Syt17	-0.98438	7.73412	-13.3631	5.29497e-11	6.22375e-09	15.4694
Npy5r	-1.18605	6.65845	-13.3558	5.34456e-11	6.22479e-09	15.46
Ccl4	2.11715	7.91733	13.3545	5.35373e-11	6.22479e-09	15.4583
Rbfox1	-0.926223	9.16565	-13.3491	5.39063e-11	6.234e-09	15.4514
Ebag9	-0.758637	8.06162	-13.3204	5.59098e-11	6.43112e-09	15.4149
Rrad	2.90713	4.85814	13.2999	5.73893e-11	6.52932e-09	15.3887
Cacna1h	-0.759837	6.29862	-13.2973	5.75773e-11	6.52932e-09	15.3854
Fcgr3	0.953538	7.7393	13.2955	5.77136e-11	6.52932e-09	15.3831
Pcdhb12	-0.914383	5.71449	-13.2907	5.80703e-11	6.52932e-09	15.3769
Sbds	0.668454	9.25607	13.2878	5.82813e-11	6.52932e-09	15.3733
Kcnj8	0.713027	5.9553	13.2477	6.13528e-11	6.83782e-09	15.3218
Fndc3b	0.795012	7.80472	13.2386	6.20649e-11	6.88153e-09	15.3102
Gm2808	0.929387	6.89881	13.2117	6.42415e-11	7.05018e-09	15.2757
Map2k3	1.13048	6.83208	13.2025	6.50089e-11	7.09818e-09	15.2638
Noct	0.753411	10.0701	13.1609	6.85816e-11	7.41302e-09	15.2102
Nmt1	-0.745765	9.02468	-13.1567	6.89515e-11	7.41574e-09	15.2048
Nufip1	0.773851	7.1269	13.149	6.96349e-11	7.45197e-09	15.1949
Pak6	1.02036	7.74478	13.1393	7.05109e-11	7.47421e-09	15.1823
Dsp	-1.89047	7.30084	-13.1383	7.05998e-11	7.47421e-09	15.1811
Pthlh	1.47072	5.03911	13.1337	7.1025e-11	7.47421e-09	15.1751
Ccl9	2.36125	6.58861	13.1314	7.12326e-11	7.47421e-09	15.1721
Nanp	-0.896683	8.07541	-13.0952	7.46451e-11	7.76557e-09	15.1252
Crh	2.61098	7.01527	13.0943	7.47315e-11	7.76557e-09	15.1241
Fam167a	1.19283	5.74354	13.0875	7.53922e-11	7.79657e-09	15.1152
Kcnab1	-1.23327	8.78458	-13.0663	7.74823e-11	7.97437e-09	15.0878
Zfp712	-0.6803	5.54621	-13.0311	8.11024e-11	8.30721e-09	15.042
Blvrb	1.78864	7.28777	13.0133	8.29958e-11	8.46085e-09	15.0188
Cstb	1.02139	9.92174	12.9901	8.5534e-11	8.67847e-09	14.9886
Esam	0.798945	7.72804	12.9722	8.75481e-11	8.79982e-09	14.9653
Fam212b	-1.23595	6.49758	-12.9641	8.84844e-11	8.85256e-09	14.9546
Rap1b	0.754217	9.60284	12.9587	8.91078e-11	8.86599e-09	14.9475
Fgfr1op	0.781882	7.96044	12.9558	8.94431e-11	8.86599e-09	14.9438
Senp7	-0.66729	6.66691	-12.9228	9.33796e-11	9.21374e-09	14.9005
Plek	1.54053	7.05956	12.9081	9.51917e-11	9.34834e-09	14.8813
Gse1	-0.939555	7.51784	-12.9047	9.5613e-11	9.34834e-09	14.8768
Oprl1	-1.28878	6.89565	-12.8879	9.77408e-11	9.51314e-09	14.8547
Slc7a4	-0.823539	7.71431	-12.8597	1.01416e-10	9.79253e-09	14.8177
Lysmd3	0.6626	7.14554	12.8589	1.01522e-10	9.79253e-09	14.8166
Pip4k2c	-0.678244	8.49937	-12.8374	1.04434e-10	9.97327e-09	14.7882
Gm13363	0.792733	10.0394	12.8357	1.04667e-10	9.97327e-09	14.786
Zdhhc23	-0.732527	7.92641	-12.8348	1.04787e-10	9.97327e-09	14.7848
Rasgef1b	1.66781	7.17571	12.8293	1.05553e-10	1.00019e-08	14.7775
Rheb	0.596095	11.8488	12.8219	1.06572e-10	1.00542e-08	14.7679
Cdk2ap1	0.660635	9.97866	12.7886	1.11353e-10	1.04516e-08	14.7238
Zfp36l1	0.912418	7.44098	12.7781	1.12903e-10	1.05132e-08	14.7099
Jun	1.32275	9.90156	12.7608	1.15501e-10	1.07087e-08	14.6871
Prr14l	-0.629135	7.89208	-12.6678	1.30642e-10	1.20606e-08	14.5633
Kcnv1	-1.09466	6.17112	-12.647	1.34287e-10	1.23281e-08	14.5356
LOC552874	-0.771207	8.95635	-12.6439	1.3485e-10	1.23281e-08	14.5314
Bcl11b	-1.21539	8.97481	-12.6416	1.3526e-10	1.23281e-08	14.5284
Eprs	1.05261	7.46229	12.6353	1.36404e-10	1.238e-08	14.5199
AU023762	3.56812	5.90092	12.6236	1.38544e-10	1.24841e-08	14.5043
Dapk1	-0.64675	9.02631	-12.6227	1.38712e-10	1.24841e-08	14.503
Slc15a3	1.9627	6.35255	12.6021	1.42556e-10	1.27766e-08	14.4756
Osgin2	1.08252	7.16196	12.5889	1.451e-10	1.29507e-08	14.4578
Rnd3	1.57487	7.30001	12.5732	1.48161e-10	1.31028e-08	14.4368
Fam110b	0.638095	7.84924	12.5724	1.48319e-10	1.31028e-08	14.4357
Lhx9	-0.881139	5.02616	-12.5709	1.48633e-10	1.31028e-08	14.4336
Ssfa2	0.912936	9.08225	12.5633	1.50135e-10	1.31812e-08	14.4235
D430019H16Rik	-0.879535	9.59328	-12.546	1.53649e-10	1.34349e-08	14.4002
Ccnyl1	0.925744	7.68696	12.5073	1.61828e-10	1.40928e-08	14.3481
Neat1	0.708125	8.02281	12.5037	1.6261e-10	1.41038e-08	14.3432
Fosb	4.29914	7.49947	12.4921	1.6515e-10	1.42095e-08	14.3276
Akap12	2.06111	8.47685	12.4881	1.66059e-10	1.42308e-08	14.3221
Emp1	1.53583	5.80035	12.4704	1.70044e-10	1.45145e-08	14.2982
Snx18	0.643121	7.22223	12.4659	1.71085e-10	1.45456e-08	14.2921
Asb3	-0.745581	5.76516	-12.4549	1.7362e-10	1.4703e-08	14.2773
Rell1	0.634027	7.53198	12.4406	1.77004e-10	1.49128e-08	14.2579
2610034E01Rik	1.40467	4.44444	12.4386	1.77484e-10	1.49128e-08	14.2552
Hspb3	1.78499	6.01645	12.4315	1.79186e-10	1.49729e-08	14.2456
A530017D24Rik	-0.697148	6.07173	-12.4298	1.79591e-10	1.49729e-08	14.2433
Gpr12	-1.63308	6.27096	-12.3779	1.92629e-10	1.59979e-08	14.1728
Erc2	-0.704938	10.4371	-12.3701	1.94663e-10	1.61046e-08	14.1622
Pop4	0.822552	8.29491	12.3528	1.99284e-10	1.64238e-08	14.1386
Il17ra	0.941606	6.29179	12.3427	2.02032e-10	1.65259e-08	14.1248
Hes5	-1.4854	4.88072	-12.3277	2.06182e-10	1.67991e-08	14.1043
Plet1	1.17081	4.55851	12.3135	2.10184e-10	1.70606e-08	14.085
Tor1aip1	0.664905	7.15057	12.3082	2.11699e-10	1.71189e-08	14.0777
Rgcc	0.794151	8.61357	12.2681	2.23566e-10	1.80109e-08	14.0228
Kcns3	-0.760763	5.76635	-12.2628	2.25183e-10	1.80688e-08	14.0156
Gadd45a	1.50131	6.2781	12.2603	2.25964e-10	1.80688e-08	14.0121
9330118A15Rik	-1.58446	6.79162	-12.2486	2.2958e-10	1.82899e-08	13.9961
Morc4	0.965081	4.86809	12.2441	2.31005e-10	1.83355e-08	13.9899
4930488B01Rik	-0.838657	9.47628	-12.225	2.37105e-10	1.87505e-08	13.9636
Col4a1	1.39217	8.67957	12.1995	2.45501e-10	1.93433e-08	13.9286
C3ar1	1.55105	6.62765	12.1833	2.51e-10	1.96387e-08	13.9063
Setmar	-0.666781	6.52936	-12.1831	2.51076e-10	1.96387e-08	13.906
Prkar2a	1.42353	7.26796	12.1716	2.55074e-10	1.98791e-08	13.89
Gdnf	2.01047	4.0785	12.1529	2.61705e-10	2.03223e-08	13.8642
Atf4	0.76023	8.03613	12.1432	2.65212e-10	2.05205e-08	13.8508
Ankrd13c	0.586032	6.99134	12.1166	2.75079e-10	2.1106e-08	13.814
Snhg12	0.676402	8.42963	12.0937	2.83882e-10	2.16536e-08	13.7822
Neurod2	-0.602765	7.00041	-12.0795	2.89494e-10	2.19895e-08	13.7625
Gmppb	0.811455	7.21959	12.0774	2.90344e-10	2.19895e-08	13.7595
Pik3c3	-0.766463	7.6009	-12.0748	2.91354e-10	2.19895e-08	13.756
Itprip	0.975023	4.54596	12.0694	2.93551e-10	2.20779e-08	13.7485
Tead1	0.789948	6.30477	12.0359	3.07433e-10	2.29614e-08	13.7019
Lbh	1.28201	6.56427	12.0246	3.12288e-10	2.31267e-08	13.6861
Prrt3	-0.980105	5.72134	-12.0237	3.12688e-10	2.31267e-08	13.6848
Anxa2	0.907117	5.37638	12.0232	3.12871e-10	2.31267e-08	13.6842
Il11	1.99611	5.37662	12.0137	3.17035e-10	2.33542e-08	13.6709
Icam1	1.94802	6.62835	12.0083	3.19389e-10	2.34473e-08	13.6634
Nbea	-0.798538	10.7012	-12.0058	3.20498e-10	2.34487e-08	13.6599
Wasf1	-0.643155	11.5049	-11.9978	3.24095e-10	2.36315e-08	13.6487
Sh3pxd2b	1.02286	6.68505	11.9949	3.25372e-10	2.36408e-08	13.6447
Tmem2	1.42352	5.93368	11.9794	3.32472e-10	2.39982e-08	13.623
Pcdh17	0.903514	8.74691	11.9731	3.35393e-10	2.41281e-08	13.6141
B4gat1	-0.990985	9.26868	-11.9322	3.5501e-10	2.52856e-08	13.5568
Sertm1	1.17543	9.22641	11.9276	3.57288e-10	2.53639e-08	13.5504
3110001I22Rik	0.753941	5.72245	11.9206	3.6078e-10	2.54724e-08	13.5406
Otub2	-1.0097	7.43795	-11.9198	3.61185e-10	2.54724e-08	13.5394
Ksr1	-0.815241	7.27385	-11.9094	3.66426e-10	2.57576e-08	13.5249
Sik2	1.19162	6.46624	11.8985	3.7208e-10	2.60699e-08	13.5095
Ugdh	0.711137	8.56611	11.8919	3.75512e-10	2.62249e-08	13.5002
Htr5b	-1.14047	5.99528	-11.8702	3.87081e-10	2.68584e-08	13.4696
Gm38524	1.20938	5.36149	11.8663	3.89177e-10	2.68923e-08	13.4641
Ankrd34b	-0.776946	6.90731	-11.8646	3.9007e-10	2.68923e-08	13.4618
Slc35f4	-0.658947	4.60217	-11.8611	3.9201e-10	2.69397e-08	13.4568
Apaf1	-0.674131	6.20323	-11.852	3.97031e-10	2.71115e-08	13.444
Bach1	0.860801	6.66221	11.8464	4.00136e-10	2.72218e-08	13.4361
Pim1	1.21976	5.14869	11.8446	4.01176e-10	2.72218e-08	13.4335
Fam69b	-0.811029	8.4903	-11.8293	4.09873e-10	2.76375e-08	13.4119
Mbd2	0.802199	8.1671	11.7724	4.4394e-10	2.96557e-08	13.3313
Akap11	-0.70873	10.5325	-11.7411	4.63921e-10	3.08946e-08	13.2869
Sertad4	-1.01052	7.55891	-11.7356	4.67553e-10	3.10403e-08	13.279
2022-09-03	-0.606097	8.94195	-11.7294	4.71673e-10	3.12175e-08	13.2701
Ctla2b	1.91583	6.99921	11.7247	4.748e-10	3.13281e-08	13.2635
Lzts3	-0.971043	9.34315	-11.706	4.87455e-10	3.18698e-08	13.2369
Muc3	1.51161	4.34028	11.6989	4.92376e-10	3.2094e-08	13.2268
Asb11	1.51875	6.78371	11.653	5.2547e-10	3.40448e-08	13.1611
Ehd4	1.23397	6.59311	11.6463	5.30472e-10	3.42656e-08	13.1515
Pecam1	1.20591	6.47418	11.5885	5.75822e-10	3.67535e-08	13.0687
Thbd	1.87091	7.51337	11.5824	5.80858e-10	3.69652e-08	13.0599
Hspa1b	3.2184	10.5058	11.5736	5.88212e-10	3.73229e-08	13.0472
Snord47	0.660461	7.85573	11.5686	5.92384e-10	3.74685e-08	13.0401
Adcy4	0.839455	5.73839	11.5655	5.95038e-10	3.74685e-08	13.0356
Filip1l	1.00544	5.10583	11.5647	5.95734e-10	3.74685e-08	13.0344
Dot1l	0.840864	7.76682	11.5445	6.13114e-10	3.84492e-08	13.0053
Pcmtd2	-0.936085	8.50448	-11.5413	6.159e-10	3.85117e-08	13.0007
Acsl4	0.970944	8.1158	11.5362	6.20403e-10	3.8621e-08	12.9934
Anxa3	1.17721	7.67604	11.5353	6.2124e-10	3.8621e-08	12.992
Fbxo25	-0.660027	8.67174	-11.5226	6.32612e-10	3.91968e-08	12.9737
Napepld	-1.11563	6.3196	-11.5209	6.34146e-10	3.91968e-08	12.9713
Spry2	0.753935	6.50347	11.5172	6.3757e-10	3.92955e-08	12.9658
Kif18a	0.930601	3.91831	11.5107	6.43488e-10	3.95469e-08	12.9565
Spata2l	-0.665817	7.43286	-11.4904	6.62481e-10	4.05667e-08	12.9271
Celf5	-0.739666	10.4111	-11.4877	6.65012e-10	4.05667e-08	12.9232
Rnf167	-0.713269	9.48113	-11.4827	6.69846e-10	4.07016e-08	12.9159
Mt1	0.898544	9.2252	11.477	6.753e-10	4.09175e-08	12.9077
Id1	1.26502	8.22531	11.4587	6.93326e-10	4.17744e-08	12.8811
Junb	2.23967	7.81142	11.4515	7.00483e-10	4.19729e-08	12.8707
Tiparp	2.08274	7.94197	11.4503	7.01693e-10	4.19729e-08	12.869
Myl12a	0.811264	7.90808	11.4495	7.02476e-10	4.19729e-08	12.8679
Slc10a6	1.91798	6.36035	11.404	7.50042e-10	4.45674e-08	12.8016
Zbtb18	-0.788829	11.9833	-11.3924	7.62704e-10	4.50708e-08	12.7847
Erbb2ip	0.805541	7.08661	11.3805	7.75914e-10	4.57258e-08	12.7674
C130030K03Rik	-1.17811	5.56499	-11.3671	7.91021e-10	4.64887e-08	12.7479
Cacna1d	-0.591301	6.60765	-11.3616	7.97362e-10	4.67107e-08	12.7398
Cyp1b1	1.11437	5.52757	11.3585	8.00907e-10	4.67107e-08	12.7353
4930430F08Rik	-0.796323	5.92181	-11.3582	8.01313e-10	4.67107e-08	12.7348
B3gnt5	1.70098	4.44616	11.3553	8.0463e-10	4.67773e-08	12.7306
Dusp5	1.54843	7.9324	11.3527	8.07631e-10	4.68252e-08	12.7269
Samd4	0.64147	6.57987	11.348	8.13225e-10	4.70227e-08	12.7199
Ogt	-0.750799	8.7433	-11.3453	8.16379e-10	4.70786e-08	12.716
Zfp804a	1.14408	6.90911	11.3387	8.24255e-10	4.73517e-08	12.7063
Uspl1	0.714593	8.93135	11.337	8.26285e-10	4.73517e-08	12.7038
Gpr3	1.28087	6.26739	11.2834	8.93075e-10	5.08202e-08	12.6252
Stambp	-0.714394	7.35827	-11.2717	9.08387e-10	5.15551e-08	12.608
Rnf125	1.82567	6.49078	11.268	9.13277e-10	5.16963e-08	12.6026
Zc4h2	-0.837756	7.68405	-11.2629	9.20026e-10	5.19416e-08	12.5951
Borcs5	-0.648209	8.46402	-11.2401	9.51054e-10	5.33262e-08	12.5616
Shisa6	-0.767569	8.38535	-11.2379	9.5411e-10	5.33262e-08	12.5583
1110038B12Rik	1.17972	8.02014	11.2377	9.54467e-10	5.33262e-08	12.558
Pcna	0.677447	10.2009	11.2358	9.57078e-10	5.33335e-08	12.5552
Grhl1	-0.613597	7.44093	-11.2245	9.72979e-10	5.40795e-08	12.5385
Ppp1r15a	1.51586	7.9084	11.2201	9.79172e-10	5.41753e-08	12.5321
Ifitm2	0.90157	8.30687	11.2198	9.79739e-10	5.41753e-08	12.5315
P4ha2	0.678386	6.5778	11.2153	9.86054e-10	5.43846e-08	12.525
Stat3	0.863763	7.56772	11.2067	9.98654e-10	5.49387e-08	12.5122
Arl15	-0.82991	7.45051	-11.1914	1.0212e-09	5.57754e-08	12.4896
Hspb1	3.12999	9.98069	11.1911	1.02164e-09	5.57754e-08	12.4892
Il6	2.5022	4.47506	11.1859	1.02946e-09	5.606e-08	12.4814
Kctd6	-0.706735	9.07513	-11.1808	1.03713e-09	5.62818e-08	12.4739
Col4a2	1.19731	7.94458	11.1797	1.03877e-09	5.62818e-08	12.4723
Dab2	1.18967	6.33917	11.1698	1.05388e-09	5.69572e-08	12.4577
Slc39a10	-0.855436	9.11424	-11.1566	1.07449e-09	5.79257e-08	12.4381
Myh9	0.620477	7.37403	11.1543	1.07806e-09	5.79728e-08	12.4348
Btaf1	0.811316	8.10938	11.1506	1.08394e-09	5.81435e-08	12.4293
Rbm14	0.628885	7.17609	11.131	1.11556e-09	5.9553e-08	12.4002
Pcsk1	2.54607	6.72917	11.1308	1.11592e-09	5.9553e-08	12.3999
Gpr4	0.823195	6.63291	11.1292	1.11852e-09	5.9553e-08	12.3975
5430416N02Rik	0.769009	6.74375	11.106	1.15727e-09	6.11494e-08	12.363
Mycl	-0.782809	5.87073	-11.1045	1.15988e-09	6.11494e-08	12.3608
Hbegf	2.45897	7.58714	11.0953	1.17565e-09	6.18295e-08	12.3471
Plk3	0.844084	6.81058	11.0933	1.17925e-09	6.18677e-08	12.344
C330006P03Rik	3.12431	9.87245	11.088	1.18835e-09	6.21933e-08	12.3362
Dnttip2	0.821646	7.37136	11.0752	1.21105e-09	6.32273e-08	12.3171
Ripk1	0.692207	5.49152	11.0424	1.27098e-09	6.60357e-08	12.2682
Htr1a	-1.1636	6.70707	-11.0079	1.33755e-09	6.93272e-08	12.2165
Ago2	0.911177	8.05749	11.0031	1.34719e-09	6.96587e-08	12.2092
Cecr6	-1.04153	7.38784	-11.0004	1.35259e-09	6.97701e-08	12.2052
A230058F20Rik	-0.966565	8.64026	-10.9915	1.37039e-09	7.05195e-08	12.192
Zfp810	-0.80115	6.57688	-10.9785	1.39716e-09	7.17253e-08	12.1724
Cd86	1.36411	5.62449	10.9562	1.44414e-09	7.36103e-08	12.1389
Mall	0.75747	4.51439	10.9523	1.4526e-09	7.38664e-08	12.133
Eif3j2	0.608063	8.77427	10.9497	1.4581e-09	7.39713e-08	12.1291
Plppr1	-0.713777	4.79849	-10.9417	1.47553e-09	7.46793e-08	12.1171
Podxl	0.761388	6.5321	10.9281	1.50577e-09	7.58527e-08	12.0966
Fam84a	-0.722329	8.7402	-10.9246	1.51368e-09	7.60733e-08	12.0913
Cltb	0.896199	7.84658	10.9138	1.53816e-09	7.70774e-08	12.075
Gm6314	-0.795375	8.37244	-10.9114	1.54365e-09	7.70774e-08	12.0714
Sstr2	1.61354	7.73349	10.9111	1.54442e-09	7.70774e-08	12.0709
Ankrd33b	1.06472	7.32964	10.8869	1.60106e-09	7.95355e-08	12.0344
Dguok	-0.591297	7.17665	-10.8825	1.61161e-09	7.98751e-08	12.0278
Tll1	3.31485	5.93444	10.8789	1.62032e-09	8.01219e-08	12.0223
Ankrd13a	1.07457	9.00417	10.8632	1.6587e-09	8.18318e-08	11.9986
Stxbp6	-1.20141	8.62512	-10.8532	1.68381e-09	8.2628e-08	11.9834
Ptpn3	-0.778153	8.81579	-10.8522	1.68636e-09	8.2628e-08	11.9819
Acvrl1	0.784034	5.91381	10.8482	1.69646e-09	8.29336e-08	11.9758
Magee1	-0.603492	9.60602	-10.8456	1.70291e-09	8.30602e-08	11.972
Zc3h6	-0.711928	5.11163	-10.8421	1.71198e-09	8.33139e-08	11.9666
A930037O16Rik	-0.883618	5.76608	-10.8368	1.72558e-09	8.35972e-08	11.9586
Rps6ka3	0.960098	6.61205	10.8271	1.75093e-09	8.4635e-08	11.9438
Emd	1.24984	8.7013	10.8255	1.75515e-09	8.46484e-08	11.9414
Ccnl1	0.909909	8.91917	10.8201	1.76935e-09	8.51425e-08	11.9332
Fndc10	-0.60712	7.27486	-10.8049	1.81007e-09	8.69077e-08	11.9102
Asphd2	-0.724136	8.54788	-10.7862	1.86163e-09	8.84348e-08	11.8817
Rpusd1	-0.640592	8.34458	-10.7859	1.86243e-09	8.84348e-08	11.8813
Adamts9	1.41846	6.51352	10.7819	1.87375e-09	8.87761e-08	11.8751
P2ry12	-1.76401	6.82814	-10.7783	1.88395e-09	8.90631e-08	11.8696
Wdr19	-0.820429	5.86678	-10.7452	1.9802e-09	9.31341e-08	11.8191
D630045J12Rik	-0.605625	6.69201	-10.7442	1.98305e-09	9.31341e-08	11.8177
Dcakd	-0.823945	7.52707	-10.7376	2.00292e-09	9.38623e-08	11.8076
Rnf112	-0.828399	9.64808	-10.7343	2.01303e-09	9.3879e-08	11.8025
Tmem123	0.745374	7.4742	10.7333	2.01586e-09	9.3879e-08	11.8011
Slc35f3	-0.739408	8.09284	-10.7326	2.01811e-09	9.3879e-08	11.7999
Pxdc1	0.96592	7.28743	10.7308	2.02365e-09	9.3879e-08	11.7972
Fosl1	1.78928	5.04297	10.7289	2.02946e-09	9.3879e-08	11.7942
Plod2	1.13345	6.07958	10.7269	2.03564e-09	9.39629e-08	11.7912
Ppan	0.681698	7.06715	10.7251	2.04098e-09	9.40073e-08	11.7885
Cebpd	0.823947	7.59933	10.7185	2.06151e-09	9.4532e-08	11.7784
Grm1	-0.936122	7.23417	-10.7169	2.06657e-09	9.4532e-08	11.7759
Phlda1	1.03513	8.72865	10.7158	2.06995e-09	9.4532e-08	11.7742
Ankrd34a	-0.74233	7.80497	-10.71	2.08815e-09	9.51241e-08	11.7654
Zeb2	-0.900423	7.18306	-10.703	2.11044e-09	9.55695e-08	11.7546
1700047I17Rik2	0.60556	6.15412	10.6979	2.12661e-09	9.60994e-08	11.7469
Cbr4	-0.669174	7.61215	-10.6888	2.1561e-09	9.72281e-08	11.7329
Rapgef2	-0.614409	11.2185	-10.6836	2.17333e-09	9.74905e-08	11.7248
Shroom3	0.645933	5.01508	10.6818	2.17907e-09	9.74905e-08	11.7222
Cep83os	-0.940399	6.28691	-10.6815	2.18005e-09	9.74905e-08	11.7217
Sipa1l3	-0.709555	9.58918	-10.6765	2.19676e-09	9.79702e-08	11.714
Tmem150c	-0.758515	7.00318	-10.6655	2.23341e-09	9.90159e-08	11.6972
Adcy9	-1.09236	8.58063	-10.6644	2.23718e-09	9.90159e-08	11.6955
Ly6a	1.24396	10.5834	10.6609	2.24936e-09	9.93504e-08	11.69
Dnajc28	-0.617259	5.47456	-10.656	2.26605e-09	9.96784e-08	11.6825
Tgm2	1.26459	6.7287	10.6502	2.28608e-09	1.00354e-07	11.6736
Cdh11	-0.672297	8.35065	-10.6362	2.33505e-09	1.02295e-07	11.6521
Nts	1.81102	7.94114	10.633	2.34633e-09	1.02534e-07	11.6472
Fam169a	-0.639646	7.84964	-10.632	2.35004e-09	1.02534e-07	11.6456
Kctd10	0.59267	8.11639	10.6253	2.3742e-09	1.03024e-07	11.6352
Insm1	-0.964718	5.29591	-10.6249	2.37563e-09	1.03024e-07	11.6346
Crem	1.0763	5.07665	10.6209	2.38988e-09	1.03433e-07	11.6286
Lrrc10b	-0.651957	8.68644	-10.6149	2.4118e-09	1.04172e-07	11.6193
Tox3	-1.00931	6.4783	-10.6016	2.46107e-09	1.06087e-07	11.5988
Wscd2	-0.846982	8.33964	-10.5924	2.49603e-09	1.07165e-07	11.5845
Ankmy2	-0.594219	7.06237	-10.5888	2.50952e-09	1.07315e-07	11.579
Gm19773	1.15039	5.53505	10.5862	2.51947e-09	1.07527e-07	11.575
Zfp386	-0.610527	7.35944	-10.5832	2.53125e-09	1.0768e-07	11.5703
Med7	0.746335	8.62023	10.5669	2.59493e-09	1.09876e-07	11.5451
Ermp1	-0.62993	7.17233	-10.5646	2.60384e-09	1.10037e-07	11.5416
Fbxo31	-0.610011	8.63844	-10.5386	2.70944e-09	1.13828e-07	11.5013
A130040M12Rik	2.00612	7.10325	10.5278	2.75431e-09	1.15488e-07	11.4847
Pdk4	1.8257	6.93092	10.4989	2.8789e-09	1.19778e-07	11.4398
Chrna5	-1.00201	4.79385	-10.4882	2.9268e-09	1.21535e-07	11.4231
Dusp1	2.28613	9.03621	10.4782	2.97194e-09	1.23172e-07	11.4076
Chek1	0.624899	4.02458	10.4731	2.99545e-09	1.23908e-07	11.3996
Hspa5	0.794203	10.1431	10.4638	3.03841e-09	1.25204e-07	11.3851
Ttc8	-0.707093	7.53265	-10.4578	3.06674e-09	1.26129e-07	11.3757
Pxk	0.805885	7.31264	10.4492	3.10756e-09	1.27146e-07	11.3623
Orai2	-0.911848	8.52504	-10.4423	3.14035e-09	1.28082e-07	11.3517
Grk5	0.625852	5.56011	10.4416	3.14398e-09	1.28082e-07	11.3505
Tmem35	0.975911	8.76211	10.4239	3.23075e-09	1.3112e-07	11.3229
Lrrk2	0.785746	6.60203	10.4151	3.27503e-09	1.3218e-07	11.3091
Car7	-0.851189	6.85105	-10.415	3.27531e-09	1.3218e-07	11.309
Svil	0.857498	7.4031	10.4093	3.30411e-09	1.32871e-07	11.3001
Ccdc32	-0.594534	8.83676	-10.408	3.31076e-09	1.32871e-07	11.298
Sphkap	-0.713188	8.14819	-10.408	3.31095e-09	1.32871e-07	11.298
Rhoq	0.735419	9.13379	10.4025	3.3392e-09	1.33754e-07	11.2894
Osbp2	-0.600528	6.8353	-10.3944	3.38142e-09	1.34943e-07	11.2766
Rbms1	0.660104	7.63118	10.3924	3.39142e-09	1.35092e-07	11.2736
Atp13a5	-1.09433	5.3096	-10.3713	3.50405e-09	1.39063e-07	11.2405
Ccdc86	0.835236	6.06665	10.3545	3.59632e-09	1.422e-07	11.2141
Sdcbp2	2.01738	6.02452	10.3247	3.76635e-09	1.4865e-07	11.1672
Dok5	1.37896	5.72852	10.309	3.85903e-09	1.51474e-07	11.1426
Gem	2.93043	5.8571	10.3031	3.89493e-09	1.52605e-07	11.1332
Micall1	1.03724	8.71449	10.2942	3.94885e-09	1.54436e-07	11.1192
Map3k8	0.829528	4.75744	10.2926	3.95898e-09	1.54551e-07	11.1166
Gm7420	-0.873222	4.24443	-10.2809	4.03147e-09	1.57096e-07	11.0982
Pno1	0.855913	8.91267	10.2679	4.11375e-09	1.60012e-07	11.0777
Fgf3	0.590528	4.85161	10.2651	4.13178e-09	1.60134e-07	11.0733
Il1rapl1	-0.901923	6.36828	-10.258	4.17787e-09	1.61474e-07	11.062
C80258	0.886747	7.18688	10.2467	4.25222e-09	1.63623e-07	11.0441
Ydjc	-0.588823	6.99974	-10.2198	4.43465e-09	1.6913e-07	11.0015
Smad6	1.3292	5.59776	10.197	4.59556e-09	1.74648e-07	10.9653
Zfp462	-0.664787	6.26252	-10.1876	4.66335e-09	1.76911e-07	10.9504
Particl	-0.727711	6.28691	-10.1695	4.79751e-09	1.81043e-07	10.9216
Cyp51	0.934182	6.72352	10.1661	4.82337e-09	1.817e-07	10.9162
C130075A20Rik	0.82719	6.40607	10.1586	4.8804e-09	1.83527e-07	10.9043
Lhx6	-0.730489	5.06577	-10.1477	4.96454e-09	1.86365e-07	10.8869
Hmga1-rs1	1.42851	9.25276	10.1445	4.99005e-09	1.86786e-07	10.8817
Cartpt	1.95951	5.93245	10.1441	4.99312e-09	1.86786e-07	10.8811
Rragd	-0.752864	6.8989	-10.135	5.06475e-09	1.89137e-07	10.8666
Golm1	-0.730423	8.77695	-10.1277	5.12308e-09	1.90983e-07	10.855
Rps25	1.15683	7.71174	10.1239	5.15416e-09	1.9181e-07	10.8488
2810403A07Rik	0.693945	6.24142	10.1206	5.18063e-09	1.92462e-07	10.8436
Glra2	1.3627	6.91539	10.1168	5.21231e-09	1.93266e-07	10.8374
Lysmd4	-0.613188	5.96145	-10.1147	5.22924e-09	1.93266e-07	10.8342
Evc2	-0.81184	6.86799	-10.1061	5.30034e-09	1.95185e-07	10.8204
Lefty1	-1.33508	7.16886	-10.1052	5.30837e-09	1.95185e-07	10.8189
Nceh1	-0.926801	7.61659	-10.1034	5.32334e-09	1.95401e-07	10.816
Eaf2	1.21796	5.54656	10.0833	5.49404e-09	2.00897e-07	10.784
Frrs1l	-0.670659	10.2602	-10.0825	5.50109e-09	2.00897e-07	10.7827
Gmpr	-1.19485	7.99366	-10.0605	5.69615e-09	2.06966e-07	10.7473
Nfe2l2	0.61952	5.5749	10.0583	5.71612e-09	2.07342e-07	10.7438
Ctgf	2.06593	7.93125	10.0572	5.72604e-09	2.07352e-07	10.742
Card19	0.694274	6.21187	10.0406	5.8776e-09	2.11558e-07	10.7155
Cyyr1	0.744343	5.58187	10.0405	5.87889e-09	2.11558e-07	10.7152
Ctsl	0.681196	7.65532	10.0402	5.88153e-09	2.11558e-07	10.7148
Ezh1	-0.678178	5.87358	-10.0337	5.94248e-09	2.13038e-07	10.7043
Zfp958	-0.665661	6.4872	-10.0258	6.01774e-09	2.15019e-07	10.6915
Jarid2	1.12953	7.60419	10.0215	6.058e-09	2.15781e-07	10.6848
5830469G19Rik	1.21737	7.42928	10.0214	6.05913e-09	2.15781e-07	10.6846
Pros1	1.48602	6.65311	10.015	6.12158e-09	2.17645e-07	10.6742
Dlg1	0.597872	7.71529	9.97576	6.51455e-09	2.29718e-07	10.611
Arpp19	1.06095	9.45008	9.97078	6.56638e-09	2.30997e-07	10.6029
Zmym2	-0.592923	8.25151	-9.97021	6.57231e-09	2.30997e-07	10.602
Dusp16	1.25766	5.93424	9.94291	6.86416e-09	2.40078e-07	10.5579
Tlr2	1.20505	6.14731	9.93588	6.94151e-09	2.41996e-07	10.5465
Clec7a	0.992881	5.18255	9.90466	7.29619e-09	2.52723e-07	10.4959
Osmr	1.00741	5.57419	9.90221	7.32472e-09	2.53304e-07	10.4919
Hsd17b12	0.794976	9.77478	9.8909	7.4584e-09	2.57512e-07	10.4735
Egr1	1.34635	10.8325	9.88568	7.52091e-09	2.59255e-07	10.465
Cend1	-0.785354	9.21839	-9.87622	7.63567e-09	2.62789e-07	10.4496
Fbxo41	-0.811545	8.32627	-9.86327	7.7956e-09	2.67865e-07	10.4286
9330184L24Rik	-1.04242	4.00482	-9.85816	7.85976e-09	2.69209e-07	10.4203
Ccdc85a	-1.38993	8.06514	-9.85247	7.93171e-09	2.70811e-07	10.411
Myt1l	-0.607811	7.65377	-9.84737	7.99691e-09	2.72173e-07	10.4027
Mas1	-0.973489	6.09365	-9.8338	8.17301e-09	2.77727e-07	10.3805
Arid5b	0.70267	5.52311	9.83102	8.20955e-09	2.7809e-07	10.376
Rogdi	-0.818223	10.0198	-9.81387	8.43887e-09	2.84961e-07	10.348
Ggta1	0.772643	5.51943	9.80826	8.51541e-09	2.86873e-07	10.3388
Slitrk1	-0.682084	9.24463	-9.80517	8.55779e-09	2.87622e-07	10.3338
Fam129b	1.07621	8.37499	9.80263	8.59287e-09	2.88016e-07	10.3296
Preb	0.676416	7.81748	9.80055	8.62168e-09	2.88417e-07	10.3262
Bag4	-0.625795	7.43671	-9.79861	8.64865e-09	2.8887e-07	10.3231
Mpped2	-0.957512	7.51157	-9.79313	8.72525e-09	2.90977e-07	10.3141
1110051M20Rik	-0.607594	8.8507	-9.79028	8.76544e-09	2.91865e-07	10.3094
Zfp189	-1.06321	6.33681	-9.78426	8.85082e-09	2.94189e-07	10.2996
Cited1	0.796225	5.14317	9.78278	8.87205e-09	2.94189e-07	10.2971
Taf10	0.682403	8.45403	9.77779	8.94363e-09	2.95965e-07	10.289
Rassf1	0.668984	6.2225	9.75681	9.2515e-09	3.04281e-07	10.2546
Slc8a2	-0.86633	5.72366	-9.75411	9.29196e-09	3.05145e-07	10.2501
Tstd3	-0.644216	7.54587	-9.75292	9.30985e-09	3.05266e-07	10.2482
Mir92-1	0.989324	4.95526	9.74917	9.36631e-09	3.06282e-07	10.242
Sbf1	-0.634461	8.67122	-9.74867	9.3739e-09	3.06282e-07	10.2412
A730017C20Rik	-0.632628	7.17069	-9.74803	9.38353e-09	3.06282e-07	10.2402
Rab9b	-0.790779	7.77181	-9.71655	9.87369e-09	3.18893e-07	10.1884
Fzd3	0.600697	5.18044	9.70925	9.99109e-09	3.22064e-07	10.1764
Ccl6	1.42274	5.34366	9.70335	1.00871e-08	3.24324e-07	10.1667
Rasgef1a	-0.631594	8.61048	-9.69969	1.01471e-08	3.25768e-07	10.1607
Icam5	-0.936191	9.65485	-9.69652	1.01993e-08	3.26956e-07	10.1554
Zfp759	-0.596809	4.80848	-9.67419	1.05757e-08	3.3552e-07	10.1186
Ccdc106	-0.717594	7.49264	-9.67203	1.06128e-08	3.36202e-07	10.115
Tacc2	-0.685742	9.68076	-9.65755	1.08655e-08	3.43197e-07	10.0911
Zc3h12c	1.22159	6.29969	9.6519	1.09659e-08	3.45657e-07	10.0818
Klhl23	-0.591721	8.22753	-9.62568	1.14439e-08	3.56784e-07	10.0384
Pcsk2	-0.792553	7.18657	-9.62563	1.14449e-08	3.56784e-07	10.0383
Spsb1	0.696084	6.8787	9.62073	1.15366e-08	3.5912e-07	10.0302
Nlgn3	-0.948617	6.16084	-9.61784	1.1591e-08	3.59774e-07	10.0254
Nfkbiz	0.923747	6.48329	9.60832	1.17725e-08	3.64878e-07	10.0096
Lrrfip1	0.691656	6.18958	9.60471	1.18421e-08	3.65981e-07	10.0036
Mpzl3	1.08096	6.08225	9.5973	1.19862e-08	3.68844e-07	9.99132
Zfp2	-0.712474	4.99035	-9.59367	1.20575e-08	3.7051e-07	9.98529
Ets2	0.591704	6.50061	9.58532	1.22231e-08	3.74529e-07	9.97142
Zfp131	0.586826	9.21775	9.58287	1.2272e-08	3.75037e-07	9.96736
Klf4	2.37718	6.61894	9.58275	1.22746e-08	3.75037e-07	9.96715
Hspa8	0.593774	10.9784	9.56562	1.26233e-08	3.84709e-07	9.93866
Ccnjl	-0.630199	5.63463	-9.56544	1.26269e-08	3.84709e-07	9.93837
Fam98a	0.60101	8.76156	9.55985	1.27431e-08	3.87151e-07	9.92906
Syn3	-0.764028	6.60884	-9.55773	1.27873e-08	3.874e-07	9.92554
Sowaha	-1.73726	8.25647	-9.55565	1.2831e-08	3.88178e-07	9.92207
Ccnk	1.12552	6.06948	9.54783	1.29964e-08	3.90982e-07	9.90904
Cdh5	0.714459	4.79905	9.54017	1.31606e-08	3.94817e-07	9.89628
Ghsr	1.31145	3.48395	9.52348	1.35258e-08	4.04082e-07	9.86844
Plin2	1.51923	7.94312	9.51711	1.3668e-08	4.07764e-07	9.8578
Vwa1	0.670922	6.77917	9.51335	1.37527e-08	4.09156e-07	9.85152
Gm13889	0.649409	6.36709	9.51123	1.38006e-08	4.10017e-07	9.84798
Gpd1l	-0.719845	8.30606	-9.50984	1.38321e-08	4.10383e-07	9.84567
Chac2	-0.595433	7.92985	-9.50718	1.38927e-08	4.11047e-07	9.84122
Rasip1	1.04105	5.99567	9.50078	1.40397e-08	4.14639e-07	9.83051
Eaf1	0.892433	6.10114	9.49353	1.42081e-08	4.18651e-07	9.81839
Guf1	-0.722113	5.34825	-9.47496	1.46491e-08	4.30467e-07	9.7873
Tesc	-1.02729	8.76259	-9.47389	1.46748e-08	4.30635e-07	9.78552
Rcan1	1.29302	8.57157	9.464	1.49159e-08	4.36652e-07	9.76894
Gm15247	1.08084	4.41059	9.46382	1.49205e-08	4.36652e-07	9.76863
Mast3	-0.890186	9.83299	-9.46118	1.49854e-08	4.37765e-07	9.76422
Lmna	0.618279	5.69587	9.46062	1.49992e-08	4.37765e-07	9.76328
Cd24a	1.00827	7.42233	9.45937	1.50302e-08	4.38074e-07	9.76118
Rasa2	0.738037	7.71444	9.44744	1.53289e-08	4.45573e-07	9.74116
Rwdd2a	-0.843583	7.74623	-9.42889	1.58057e-08	4.57668e-07	9.71001
Ccl7	1.30512	4.85449	9.42877	1.58088e-08	4.57668e-07	9.70981
Slc6a8	0.778754	9.01758	9.426	1.58813e-08	4.58534e-07	9.70515
Trip6	0.806734	6.7376	9.42317	1.59558e-08	4.59476e-07	9.70039
Tmtc4	-0.664486	6.32469	-9.42314	1.59567e-08	4.59476e-07	9.70034
Gtpbp4	0.681222	7.91179	9.42218	1.59819e-08	4.59588e-07	9.69873
Calca	0.741394	4.8861	9.40703	1.63874e-08	4.69366e-07	9.67324
Eml6	-0.652252	5.33851	-9.40259	1.65085e-08	4.71578e-07	9.66575
Ccbe1	-0.924082	4.67953	-9.3961	1.66868e-08	4.76037e-07	9.65483
Nr4a1	1.99404	10.0159	9.39453	1.67303e-08	4.76647e-07	9.65218
Lmbr1	-0.623723	6.37625	-9.39243	1.67885e-08	4.77674e-07	9.64864
Rnf217	1.92242	6.4529	9.37901	1.71662e-08	4.8713e-07	9.62601
Eng	0.79822	7.09391	9.37821	1.7189e-08	4.87136e-07	9.62466
Angptl4	0.688761	4.41416	9.37706	1.72217e-08	4.8715e-07	9.62273
Hax1	0.699504	10.1872	9.3766	1.72348e-08	4.8715e-07	9.62195
Kitl	1.59226	6.45272	9.3486	1.80551e-08	5.08499e-07	9.57465
Taf1a	0.692087	6.7995	9.3426	1.8236e-08	5.11416e-07	9.56451
130004C03	1.24257	7.53189	9.34115	1.82802e-08	5.11987e-07	9.56205
Btg1	0.648595	8.11605	9.33614	1.84331e-08	5.14261e-07	9.55357
Atg4c	-0.767587	6.81362	-9.33249	1.85452e-08	5.16719e-07	9.5474
Per1	1.31424	8.2484	9.30906	1.9283e-08	5.3382e-07	9.50771
Zfp758	-0.625661	7.2675	-9.29635	1.96961e-08	5.43159e-07	9.48614
Bcl11a	-0.81402	6.39826	-9.29315	1.98017e-08	5.45371e-07	9.4807
Vgf	0.89513	10.7139	9.28411	2.01026e-08	5.52244e-07	9.46535
Csf2rb	0.970413	4.50385	9.27574	2.03856e-08	5.59305e-07	9.45113
Fxyd5	1.15748	7.4086	9.2736	2.04586e-08	5.60592e-07	9.44749
Il1rn	1.04946	5.01183	9.26542	2.07403e-08	5.66148e-07	9.43357
Coq10b	1.13397	8.44587	9.25969	2.09399e-08	5.70452e-07	9.42383
Slc26a10	-1.58247	4.95341	-9.25902	2.09634e-08	5.70452e-07	9.42269
Zcchc7	-0.612403	8.2062	-9.25205	2.12092e-08	5.76022e-07	9.41083
Gdap1	-0.589133	7.78653	-9.24779	2.13612e-08	5.79419e-07	9.40356
Atp7a	1.02968	7.29337	9.23942	2.16626e-08	5.86854e-07	9.3893
Grem2	1.28705	6.87835	9.21575	2.25394e-08	6.07546e-07	9.34893
Pdyn	1.81943	6.30854	9.20977	2.27665e-08	6.12901e-07	9.33872
Cygb	-0.997981	7.42938	-9.2047	2.29612e-08	6.17369e-07	9.33006
Ccdc112	-0.808273	7.08677	-9.19177	2.34655e-08	6.27789e-07	9.30795
Rhoj	1.90557	7.10192	9.16595	2.45073e-08	6.50805e-07	9.26374
Lilrb4a	2.79756	7.77936	9.15937	2.47802e-08	6.57009e-07	9.25246
Iqgap2	-1.16906	8.01447	-9.15828	2.48257e-08	6.57009e-07	9.2506
Id3	0.703819	8.50389	9.15812	2.48326e-08	6.57009e-07	9.25032
Pm20d2	-0.762537	6.27583	-9.15417	2.49981e-08	6.58958e-07	9.24355
Fgd5	0.662743	6.02696	9.14711	2.52975e-08	6.66033e-07	9.23144
Srsf12	-0.884397	7.20581	-9.14553	2.5365e-08	6.66995e-07	9.22872
Cacnb2	-0.87286	8.06011	-9.13783	2.56969e-08	6.73057e-07	9.21549
Lancl2	-0.60671	8.076	-9.13728	2.57207e-08	6.73057e-07	9.21455
B830032F12	-1.04694	9.48551	-9.13112	2.59892e-08	6.78431e-07	9.20398
Akap6	-0.691821	6.95578	-9.12812	2.6121e-08	6.80366e-07	9.19883
Inpp4b	-0.589838	4.53361	-9.09923	2.74285e-08	7.09118e-07	9.14912
Kcne4	0.793066	6.10583	9.0834	2.81732e-08	7.22423e-07	9.12185
Syt13	-0.779952	8.78988	-9.08081	2.82971e-08	7.24608e-07	9.11738
A530058O07Rik	-0.888051	4.63831	-9.07415	2.86184e-08	7.30651e-07	9.10589
Sirpa	-0.78754	8.66437	-9.07381	2.8635e-08	7.30651e-07	9.1053
Zfp94	-0.85766	5.29136	-9.04093	3.02781e-08	7.66215e-07	9.0485
A830010M09Rik	-0.724846	7.86096	-9.0394	3.03569e-08	7.67306e-07	9.04585
Fam217b	-0.778051	9.29016	-9.03495	3.05874e-08	7.71318e-07	9.03815
Pfkl	-0.595596	7.9869	-9.03209	3.07363e-08	7.74167e-07	9.03321
Smg7	0.756392	8.47041	9.02845	3.09268e-08	7.77145e-07	9.02692
Sec14l1	-0.618264	8.88743	-9.01669	3.15521e-08	7.89169e-07	9.00654
Kcna4	0.779773	6.82236	9.01264	3.17703e-08	7.91864e-07	8.99952
Zfp239	-0.818455	7.60317	-9.01013	3.19062e-08	7.94331e-07	8.99518
Tubb6	1.17761	5.69196	9.00095	3.24092e-08	8.04991e-07	8.97925
Plce1	1.2341	7.77596	8.99844	3.25479e-08	8.07504e-07	8.9749
Dpysl4	-0.593432	7.0268	-8.99507	3.27355e-08	8.10289e-07	8.96905
Ltbr	0.820584	6.71269	8.99216	3.28984e-08	8.13023e-07	8.964
Tnfrsf12a	1.61582	7.28493	8.99175	3.29216e-08	8.13023e-07	8.96328
Pdgfc	0.637379	6.90819	8.97976	3.36017e-08	8.28869e-07	8.94246
Igfbp7	0.617	6.77637	8.97484	3.3885e-08	8.34407e-07	8.93391
Gpnmb	0.906363	5.11965	8.97451	3.39039e-08	8.34407e-07	8.93335
Ano6	0.656308	7.62575	8.97022	3.41531e-08	8.39581e-07	8.92589
Camk2b	-0.775687	10.5101	-8.96343	3.45515e-08	8.47437e-07	8.91408
Caly	-0.932105	9.90271	-8.95641	3.49684e-08	8.54739e-07	8.90187
Tmem252	1.16825	5.81558	8.95361	3.51361e-08	8.57863e-07	8.897
Plk5	-0.914173	6.43638	-8.95159	3.5258e-08	8.59862e-07	8.89348
Onecut2	0.790939	5.70004	8.95047	3.53258e-08	8.59968e-07	8.89152
Dck	-0.61503	6.73709	-8.95019	3.53423e-08	8.59968e-07	8.89104
Zfp932	-0.589412	8.34157	-8.94372	3.57358e-08	8.67582e-07	8.87977
Lrpap1	0.721204	9.89532	8.94228	3.58241e-08	8.68745e-07	8.87726
Pstpip2	-0.626671	5.27783	-8.93689	3.61556e-08	8.73828e-07	8.86788
Ogfrl1	-0.662429	8.53699	-8.93601	3.62103e-08	8.74169e-07	8.86634
Ctla2a	1.78022	8.9492	8.93425	3.63195e-08	8.74907e-07	8.86327
Mmrn2	0.662227	5.86487	8.93421	3.63223e-08	8.74907e-07	8.8632
Slc5a3	0.867397	6.58711	8.93345	3.63694e-08	8.75062e-07	8.86188
Mapkapk3	1.12444	5.82327	8.92663	3.67966e-08	8.83365e-07	8.84998
Errfi1	1.58533	9.25313	8.92048	3.71864e-08	8.90055e-07	8.83925
Mbd4	-0.685971	5.05732	-8.92028	3.71994e-08	8.90055e-07	8.8389
Hebp1	-0.862441	7.95015	-8.91951	3.72483e-08	8.90233e-07	8.83756
BC038331	-0.695637	5.67662	-8.90715	3.80458e-08	9.0527e-07	8.81599
Adgrf5	0.746388	6.3503	8.87945	3.98994e-08	9.42081e-07	8.76755
Ripply2	-1.86839	5.57757	-8.87472	4.02253e-08	9.47697e-07	8.75927
H6pd	0.636985	6.07689	8.87347	4.03115e-08	9.48688e-07	8.75709
Slc9a2	-1.07637	5.99262	-8.87206	4.04094e-08	9.49953e-07	8.75462
Mterf2	-0.902528	7.28657	-8.87103	4.04814e-08	9.50606e-07	8.7528
Selplg	-0.784925	6.71758	-8.86777	4.07089e-08	9.54905e-07	8.7471
Slc2a13	0.667343	9.8233	8.86398	4.09752e-08	9.60104e-07	8.74046
Prosc	0.694439	7.51283	8.86287	4.10535e-08	9.60894e-07	8.73851
Icam2	0.78024	5.55756	8.86087	4.11949e-08	9.63156e-07	8.73501
Kctd4	-1.21758	8.77855	-8.85928	4.1308e-08	9.64105e-07	8.73222
Srrm4os	0.659754	6.98677	8.85904	4.13252e-08	9.64105e-07	8.7318
Gpr27	-0.585537	6.70592	-8.84815	4.21072e-08	9.79163e-07	8.71271
Trim23	-0.603728	5.77867	-8.84612	4.22549e-08	9.81537e-07	8.70914
Extl2	-0.659436	9.09065	-8.84405	4.24059e-08	9.83097e-07	8.70551
Brinp1	0.662869	10.2687	8.8431	4.24751e-08	9.83465e-07	8.70385
Pmvk	1.28597	7.95991	8.83688	4.2933e-08	9.91933e-07	8.69293
Ftx	-1.01738	7.86976	-8.82893	4.35256e-08	1.00454e-06	8.67897
Zfp39	-0.653097	5.04212	-8.8266	4.37007e-08	1.00554e-06	8.67488
Tnfrsf22	0.810546	4.94106	8.82649	4.3709e-08	1.00554e-06	8.67468
Sox11	1.28843	7.8937	8.81517	4.45714e-08	1.0212e-06	8.65479
Igf2bp2	1.43116	4.16688	8.81516	4.45723e-08	1.0212e-06	8.65477
Narf	-0.727298	6.18643	-8.81507	4.45797e-08	1.0212e-06	8.6546
Zfp354c	-0.667608	6.50872	-8.81313	4.4729e-08	1.02353e-06	8.65119
Sele	0.820464	3.178	8.80622	4.52664e-08	1.03473e-06	8.63903
Npy2r	-1.70957	7.84498	-8.79838	4.58834e-08	1.0437e-06	8.62524
1810011O10Rik	1.94768	5.3672	8.78606	4.68722e-08	1.06352e-06	8.60353
Mctp1	-1.06457	6.6893	-8.78184	4.72158e-08	1.06947e-06	8.59609
Rab27b	-0.712116	6.60871	-8.77854	4.74861e-08	1.07293e-06	8.59027
Tac1	1.03581	6.54581	8.77287	4.79548e-08	1.07721e-06	8.58027
Arsb	-0.61174	6.6008	-8.76907	4.82716e-08	1.08238e-06	8.57356
Picalm	0.588152	8.57788	8.76842	4.83252e-08	1.08238e-06	8.57243
LOC75771	0.873213	5.55631	8.76804	4.83573e-08	1.08238e-06	8.57176
Mapk4	1.27665	8.75385	8.76331	4.87554e-08	1.08902e-06	8.56341
Tgif1	1.28198	5.07039	8.7611	4.89429e-08	1.09208e-06	8.5595
Cenpq	0.602588	6.21924	8.75498	4.94648e-08	1.10144e-06	8.54869
BB212172	-0.740386	6.50173	-8.75211	4.97114e-08	1.10464e-06	8.54363
Chml	0.643323	5.06514	8.74975	4.99156e-08	1.10803e-06	8.53945
Gltscr2	1.48486	8.51857	8.74845	5.00278e-08	1.10938e-06	8.53717
Gm5879	0.813656	5.80979	8.74174	5.06143e-08	1.12008e-06	8.5253
2900018E21Rik	-0.644804	4.90124	-8.73937	5.08233e-08	1.12194e-06	8.5211
Porcn	-0.594074	8.4988	-8.73169	5.1505e-08	1.13335e-06	8.50753
Capn1	-0.604427	6.26334	-8.72481	5.2125e-08	1.14292e-06	8.49534
Olfm1	-0.679234	10.9643	-8.71509	5.30133e-08	1.16004e-06	8.47813
A930017M01Rik	-0.757647	5.8001	-8.71392	5.3121e-08	1.16121e-06	8.47606
Rpl12	0.793373	6.8875	8.70966	5.35158e-08	1.1669e-06	8.46852
C730049O14Rik	1.45805	6.99893	8.70787	5.36834e-08	1.16876e-06	8.46533
Rufy2	-0.654686	5.40575	-8.70244	5.41933e-08	1.17821e-06	8.45571
Pkib	-0.6445	4.96349	-8.68918	5.54595e-08	1.20134e-06	8.43218
Rnf182	-0.6577	7.74609	-8.68786	5.55872e-08	1.2029e-06	8.42984
Fbn1	0.740596	4.76971	8.68662	5.57072e-08	1.20428e-06	8.42764
Etv6	0.674701	5.78811	8.68252	5.61068e-08	1.20928e-06	8.42036
Deb1	0.969189	9.48008	8.67738	5.66121e-08	1.21773e-06	8.41123
Kcnip4	-1.04165	8.11711	-8.66857	5.74888e-08	1.23535e-06	8.39557
Ankrd63	-1.68031	6.64767	-8.654	5.89695e-08	1.26338e-06	8.36967
Crispld2	1.10652	6.61881	8.64927	5.94588e-08	1.27133e-06	8.36125
Pde8b	-0.655948	7.40991	-8.64281	6.0134e-08	1.28449e-06	8.34975
Cers1	-0.622146	8.55913	-8.63277	6.11995e-08	1.30337e-06	8.33186
Crls1	-0.601485	7.89287	-8.62139	6.24308e-08	1.32696e-06	8.31157
Vps50	-0.592008	7.64445	-8.61814	6.27867e-08	1.33321e-06	8.30578
Nrg3	-0.613476	5.97634	-8.61179	6.34899e-08	1.34284e-06	8.29443
Map3k6	1.0826	6.0722	8.6109	6.35891e-08	1.34362e-06	8.29284
Creb3l2	0.637404	6.37253	8.58349	6.6721e-08	1.40016e-06	8.24386
Dgat2	-0.585757	8.90066	-8.57966	6.71706e-08	1.40685e-06	8.23702
Furin	1.02248	7.28591	8.57474	6.77534e-08	1.41515e-06	8.22822
Snhg6	0.756986	9.75031	8.57473	6.7755e-08	1.41515e-06	8.22819
Etv3	0.975202	6.49084	8.5741	6.78296e-08	1.41515e-06	8.22707
Samd4b	0.682105	7.89533	8.57288	6.79761e-08	1.41683e-06	8.22487
Magef1	-0.726522	6.65711	-8.56808	6.85514e-08	1.42338e-06	8.21629
Slco5a1	0.631507	5.27001	8.56805	6.85551e-08	1.42338e-06	8.21623
2310058N22Rik	-0.68334	7.86001	-8.56702	6.86795e-08	1.42459e-06	8.21439
Pitpnm2	-0.6943	7.09788	-8.55321	7.03681e-08	1.4568e-06	8.18964
Gm12854	1.57728	8.27603	8.55218	7.04951e-08	1.45803e-06	8.1878
Pdcd4	-0.823544	9.54987	-8.54445	7.14614e-08	1.47659e-06	8.17394
Tlr13	1.08631	5.78918	8.54348	7.1583e-08	1.47769e-06	8.1722
Ybx3	0.691538	8.43142	8.53798	7.22806e-08	1.4878e-06	8.16232
6430537K16Rik	0.853141	5.23645	8.5342	7.27635e-08	1.49488e-06	8.15554
Fam19a1	-1.21431	8.39229	-8.53218	7.30226e-08	1.49592e-06	8.15192
Tspyl3	-1.00087	7.34163	-8.53024	7.32735e-08	1.49963e-06	8.14842
Chn1	-1.11883	10.2387	-8.52011	7.45931e-08	1.52229e-06	8.13024
Mgat4c	-0.959402	5.01881	-8.51576	7.51679e-08	1.53257e-06	8.12242
Trpc4	-0.649929	6.6082	-8.51058	7.58588e-08	1.54364e-06	8.11309
Zbtb8b	-0.655889	5.059	-8.50279	7.69088e-08	1.56067e-06	8.09909
Pappa	0.991284	4.61355	8.49799	7.75642e-08	1.57248e-06	8.09044
Lrrc4b	-1.0112	7.73193	-8.49738	7.7648e-08	1.5727e-06	8.08934
Fam46c	0.724488	4.75089	8.49537	7.79232e-08	1.57679e-06	8.08574
BB070754	1.38166	6.91017	8.4913	7.8486e-08	1.58669e-06	8.07841
Gm7334	0.922327	9.96973	8.48771	7.89851e-08	1.59528e-06	8.07195
9130024F11Rik	-1.04577	5.53715	-8.47715	8.04756e-08	1.62136e-06	8.0529
Smim3	1.04369	8.50539	8.47695	8.05028e-08	1.62136e-06	8.05255
Tspan13	-0.705623	10.6552	-8.47228	8.11718e-08	1.63178e-06	8.04412
Spin4	0.838302	4.40352	8.47136	8.13032e-08	1.6329e-06	8.04248
Herc3	1.09966	7.85158	8.4613	8.27648e-08	1.65915e-06	8.02432
Creg2	-1.13934	5.5106	-8.45504	8.36877e-08	1.67453e-06	8.01302
Smim17	-1.85068	6.53808	-8.4539	8.38573e-08	1.67637e-06	8.01096
Gpr83	-0.73526	6.57572	-8.44985	8.44609e-08	1.6853e-06	8.00365
Wipf3	-0.768684	11.55	-8.44415	8.53198e-08	1.69929e-06	7.99334
Ksr2	-0.590761	5.9754	-8.44334	8.54418e-08	1.70014e-06	7.99189
Diaph3	0.840596	4.57789	8.43627	8.65202e-08	1.71842e-06	7.97911
Gxylt1	0.589721	7.34356	8.43219	8.7149e-08	1.72772e-06	7.97173
Pnma2	-1.04224	6.95716	-8.43126	8.72929e-08	1.72898e-06	7.97005
Msn	1.50924	8.21314	8.42836	8.77444e-08	1.73632e-06	7.96479
Utp14b	0.709671	6.51683	8.41812	8.93553e-08	1.76657e-06	7.94625
1700086L19Rik	1.34173	7.23548	8.41721	8.94987e-08	1.76779e-06	7.94462
Gm2137	-0.619017	7.66584	-8.41542	8.97836e-08	1.77016e-06	7.94138
Ccdc177	-1.15242	6.79753	-8.41379	9.00453e-08	1.77369e-06	7.93842
Adam8	1.54802	6.65285	8.41099	9.04937e-08	1.77764e-06	7.93335
Bves	0.974786	5.88088	8.40998	9.06564e-08	1.77921e-06	7.93152
A330068G13Rik	-0.669955	8.47002	-8.40413	9.16046e-08	1.79455e-06	7.92092
Tnfrsf23	1.59236	4.44055	8.39956	9.23533e-08	1.80757e-06	7.91263
Dbn1	-0.601089	8.57673	-8.39795	9.26181e-08	1.80967e-06	7.90971
Ttc30b	-0.867423	7.44212	-8.39788	9.26289e-08	1.80967e-06	7.90959
Smoc2	-1.17909	6.50748	-8.39092	9.37834e-08	1.8289e-06	7.89697
Btg2	2.03017	7.96302	8.38808	9.42598e-08	1.83159e-06	7.89181
Ntf3	-1.08923	5.91725	-8.38806	9.42619e-08	1.83159e-06	7.89178
Rab20	1.34504	3.5548	8.38718	9.44105e-08	1.83282e-06	7.89018
Plscr1	0.820927	3.90581	8.38277	9.51557e-08	1.84396e-06	7.88217
Pddc1	-0.674745	6.76336	-8.37769	9.60195e-08	1.85736e-06	7.87296
Kdm6b	1.14128	7.86247	8.36642	9.79695e-08	1.89337e-06	7.85247
A830021M18Rik	-0.910628	4.76715	-8.3615	9.88325e-08	1.90834e-06	7.84353
Pvalb	-1.04612	8.40417	-8.35773	9.95003e-08	1.91951e-06	7.83667
Zfp811	-0.604144	5.14908	-8.35517	9.99561e-08	1.92485e-06	7.83202
Ptger4	1.02049	4.46239	8.3482	1.01207e-07	1.94545e-06	7.81935
Lrif1	-0.6432	7.12581	-8.33819	1.03032e-07	1.97638e-06	7.80113
Idi1	0.981687	8.3785	8.33787	1.03092e-07	1.97638e-06	7.80054
Jakmip1	-0.629196	6.54743	-8.3321	1.04161e-07	1.99306e-06	7.79002
Ier5	0.762333	7.63919	8.33166	1.04243e-07	1.99306e-06	7.78922
Smarca2	-0.766629	7.65906	-8.32665	1.05182e-07	2.00395e-06	7.78009
Mef2a	-0.626318	7.55439	-8.32352	1.05771e-07	2.0134e-06	7.77439
Rrbp1	0.85709	6.53036	8.3199	1.0646e-07	2.02417e-06	7.76778
Fbxo33	1.51143	9.4368	8.31664	1.07081e-07	2.03114e-06	7.76185
Orai3	-0.721578	6.99322	-8.30061	1.102e-07	2.08295e-06	7.73259
Ak5	-0.786797	9.58364	-8.29689	1.10938e-07	2.09323e-06	7.72579
Htra4	-1.17935	4.95336	-8.29476	1.11362e-07	2.09571e-06	7.7219
Lgals3	2.11422	6.79395	8.2891	1.12499e-07	2.11156e-06	7.71155
Zfp322a	-0.626675	7.96567	-8.2884	1.12639e-07	2.11235e-06	7.71028
Syt16	-0.858999	8.40235	-8.28383	1.13566e-07	2.12418e-06	7.70193
Gng2	-0.94091	8.75645	-8.27454	1.15477e-07	2.14514e-06	7.68493
1110032F04Rik	-0.738009	5.20167	-8.2652	1.1743e-07	2.17172e-06	7.66784
Ncf2	0.656348	5.46218	8.26477	1.17521e-07	2.17172e-06	7.66704
3100002H09Rik	-0.795802	5.12389	-8.26338	1.17814e-07	2.1734e-06	7.66451
Aloxe3	1.16702	7.34516	8.26265	1.17969e-07	2.17439e-06	7.66317
D430041D05Rik	-0.857508	8.18892	-8.26171	1.18168e-07	2.17619e-06	7.66145
Xirp1	0.971941	4.65754	8.25269	1.20101e-07	2.20612e-06	7.64492
Ccne2	-0.848727	4.29765	-8.2421	1.2241e-07	2.2447e-06	7.62551
Mthfd2	0.848345	6.70435	8.23669	1.23607e-07	2.25895e-06	7.61559
Lonrf3	1.13883	7.77433	8.23506	1.23971e-07	2.26367e-06	7.6126
Krt222	-1.15602	6.56958	-8.23407	1.24191e-07	2.26552e-06	7.61079
Phlda3	0.755498	7.74196	8.23367	1.24282e-07	2.26552e-06	7.61004
Tmem126b	-0.686099	6.41239	-8.22822	1.25507e-07	2.28591e-06	7.60004
Chst15	-0.794519	7.31776	-8.21436	1.28682e-07	2.33232e-06	7.57458
2900064B18Rik	1.34064	5.58281	8.21426	1.28706e-07	2.33232e-06	7.5744
Ciapin1	0.675132	6.94718	8.21027	1.29636e-07	2.34324e-06	7.56706
Mat2a	0.601328	9.2786	8.20946	1.29823e-07	2.3437e-06	7.56558
Spata5l1	0.595363	3.68105	8.20265	1.31429e-07	2.36573e-06	7.55306
Isg20	0.697297	5.42693	8.19573	1.33081e-07	2.39145e-06	7.54033
C81608	-0.676408	6.61713	-8.19317	1.33698e-07	2.39697e-06	7.53562
Gm9866	-0.910919	5.30403	-8.19169	1.34056e-07	2.39697e-06	7.53289
Phf10	0.784871	8.0673	8.18161	1.3652e-07	2.4289e-06	7.51433
Decr2	-0.796385	7.02374	-8.17932	1.37087e-07	2.43296e-06	7.5101
Cry1	1.16375	6.96543	8.17648	1.37791e-07	2.44344e-06	7.50488
Bmyc	-0.752886	8.49945	-8.17409	1.38389e-07	2.45201e-06	7.50047
B4galt1	0.644216	6.825	8.1732	1.38613e-07	2.45396e-06	7.49882
2900019E01Rik	-0.748751	6.80399	-8.16779	1.39976e-07	2.47198e-06	7.48885
Phyhip	-1.22591	9.30782	-8.16443	1.40828e-07	2.48499e-06	7.48267
Arih2	0.682089	7.52292	8.15872	1.42292e-07	2.50672e-06	7.47212
Mdk	0.618705	7.68829	8.14255	1.4652e-07	2.56649e-06	7.44228
Clic1	1.27463	7.70902	8.13904	1.47455e-07	2.57658e-06	7.4358
Sdhaf4	-0.604746	8.77106	-8.13895	1.47479e-07	2.57658e-06	7.43563
Saa3	1.64851	6.01771	8.13859	1.47576e-07	2.57658e-06	7.43496
Gpr35	1.14052	4.13949	8.13381	1.48861e-07	2.59692e-06	7.42612
Galnt18	-0.588104	8.11785	-8.13191	1.49376e-07	2.60379e-06	7.42261
Hist1h4m	1.16184	5.11454	8.1265	1.50848e-07	2.62307e-06	7.41261
Mcf2l	-0.738435	9.28813	-8.12543	1.51142e-07	2.62606e-06	7.41063
Nedd4l	-0.603338	8.12008	-8.12478	1.51319e-07	2.62631e-06	7.40943
Serpinh1	1.15397	7.68072	8.12449	1.514e-07	2.62631e-06	7.40889
Tmem179	-0.605852	8.55322	-8.12371	1.51615e-07	2.62676e-06	7.40744
Abt1	1.399	8.14681	8.11742	1.53356e-07	2.64955e-06	7.3958
Tmem200a	-0.634624	6.16949	-8.11665	1.53569e-07	2.6511e-06	7.39439
Rgs16	0.749453	6.06667	8.10691	1.56313e-07	2.6872e-06	7.37634
Sphk1	1.60917	5.23123	8.10613	1.56535e-07	2.6872e-06	7.3749
Traip	-0.726041	6.12266	-8.10037	1.5818e-07	2.71112e-06	7.36424
Fas	0.814465	5.31071	8.09259	1.60436e-07	2.74096e-06	7.34981
Zcchc5	-0.588648	5.17833	-8.09202	1.60601e-07	2.74096e-06	7.34876
Atp8b1	1.03147	4.0762	8.09191	1.60633e-07	2.74096e-06	7.34856
Shroom4	0.700873	6.61109	8.08099	1.63856e-07	2.78841e-06	7.32831
Epb41l4a	0.641034	6.15379	8.07999	1.64156e-07	2.7913e-06	7.32645
Arhgap12	-0.724458	5.63138	-8.07569	1.65445e-07	2.80922e-06	7.31847
Cast	0.655352	5.80038	8.07518	1.65601e-07	2.80922e-06	7.31751
Rgs4	0.961228	9.39595	8.07297	1.66268e-07	2.8183e-06	7.31342
Pja2	-0.706853	10.0968	-8.06176	1.69699e-07	2.86742e-06	7.2926
Elmod1	-0.7703	10.7109	-8.05625	1.71413e-07	2.88958e-06	7.28235
Map3k5	1.61121	7.54751	8.04755	1.74156e-07	2.9248e-06	7.26617
Cxcl1	1.16479	6.21918	8.04747	1.74183e-07	2.9248e-06	7.26602
Pnp	0.647269	8.71794	8.03546	1.78043e-07	2.97846e-06	7.24367
Rln1	0.782329	3.85011	8.02795	1.80503e-07	3.01445e-06	7.22969
Mapkapk2	1.10153	7.36712	8.02608	1.8112e-07	3.02155e-06	7.22621
2010107G23Rik	-0.607526	7.60912	-8.02582	1.81208e-07	3.02155e-06	7.22571
Fam189b	-0.606912	8.04816	-8.02503	1.8147e-07	3.02356e-06	7.22424
Lypd6b	-0.779166	5.93956	-8.022	1.82478e-07	3.03801e-06	7.21859
Klhl42	-0.58552	6.65581	-8.01507	1.84806e-07	3.06726e-06	7.20568
Efhd2	0.618504	10.9599	8.01418	1.85106e-07	3.06987e-06	7.20402
Adcyap1	1.35071	5.23997	8.01003	1.86516e-07	3.09088e-06	7.19629
Cd9	0.97406	9.87471	8.00514	1.88193e-07	3.1157e-06	7.18717
Akr1c18	-0.900947	5.89119	-8.00291	1.88963e-07	3.1218e-06	7.183
Ppp3ca	-0.816828	11.5321	-7.99889	1.90357e-07	3.13762e-06	7.17551
Adpgk	0.813478	5.95518	7.99792	1.90699e-07	3.14083e-06	7.17368
Lhfp	0.753551	8.34473	7.9887	1.93947e-07	3.18945e-06	7.15647
Apol8	-0.797697	5.16783	-7.98816	1.94139e-07	3.19018e-06	7.15546
Rasgrf2	-0.794657	6.9979	-7.98477	1.95348e-07	3.20514e-06	7.14913
Prg4	1.59617	7.12835	7.98319	1.95914e-07	3.21198e-06	7.14618
Arhgef4	-0.665077	8.5169	-7.98261	1.96122e-07	3.21293e-06	7.1451
Homez	-0.820388	4.83738	-7.98141	1.96555e-07	3.21757e-06	7.14285
Dclk1	0.745341	9.47115	7.97455	1.99046e-07	3.24846e-06	7.13002
Akap5	-1.04554	6.32416	-7.97335	1.99484e-07	3.25068e-06	7.12778
Zc3hav1l	-0.790597	6.20319	-7.96763	2.01589e-07	3.27754e-06	7.11708
Mtfp1	-0.806575	8.95929	-7.96533	2.02442e-07	3.28643e-06	7.11277
Gpr61	-0.733322	6.71162	-7.9622	2.03609e-07	3.30289e-06	7.10691
D13Ertd787e	0.618742	4.54737	7.95897	2.04819e-07	3.31501e-06	7.10088
Nuak2	0.722555	5.52297	7.95728	2.05456e-07	3.32282e-06	7.09771
Chrna7	-1.03064	6.66386	-7.95434	2.06569e-07	3.33831e-06	7.0922
Igfbp3	1.03171	6.61873	7.95369	2.06815e-07	3.33979e-06	7.09099
2610524H06Rik	-0.608021	6.72425	-7.94602	2.09751e-07	3.36949e-06	7.07662
Gm715	-0.792876	5.61551	-7.9397	2.12204e-07	3.40127e-06	7.06477
Ptk2b	-1.31589	9.32716	-7.93736	2.13116e-07	3.41335e-06	7.0604
Synpo	1.29768	7.64277	7.92915	2.16362e-07	3.46275e-06	7.04499
Spin2c	-0.653291	6.40556	-7.92715	2.17159e-07	3.47293e-06	7.04124
Sema5a	-0.82312	5.89841	-7.92663	2.17369e-07	3.4737e-06	7.04026
Hrasls	-0.856279	6.22942	-7.91824	2.20753e-07	3.51995e-06	7.02451
Fam49b	-0.626729	9.58521	-7.90743	2.25193e-07	3.57747e-06	7.00422
Piezo1	0.827585	6.61764	7.90181	2.2754e-07	3.60146e-06	6.99365
Cdr2	1.10468	7.38322	7.89776	2.29244e-07	3.62043e-06	6.98604
Hsph1	1.13745	11.1186	7.89722	2.29473e-07	3.6214e-06	6.98502
Faah	-1.03655	7.80694	-7.8949	2.30459e-07	3.63429e-06	6.98065
Gria3	-1.11019	8.67948	-7.89338	2.31107e-07	3.64184e-06	6.97779
Kcnt2	-1.49276	7.32172	-7.88602	2.34266e-07	3.68831e-06	6.96396
Col18a1	0.783803	5.89964	7.88571	2.34399e-07	3.68831e-06	6.96337
Anxa5	0.678975	9.49058	7.872	2.40413e-07	3.77044e-06	6.93755
Tnfrsf1a	1.18175	8.80254	7.86815	2.42129e-07	3.79049e-06	6.9303
Sprn	-1.14306	8.15395	-7.8659	2.43138e-07	3.8008e-06	6.92606
Afap1l1	0.684336	7.2187	7.85788	2.46774e-07	3.84925e-06	6.91093
Arhgap15	-0.679409	5.15482	-7.8454	2.52538e-07	3.92777e-06	6.8874
Ucp2	0.965328	7.7118	7.84474	2.52846e-07	3.92971e-06	6.88616
Gpx8	1.49459	7.13945	7.83336	2.58234e-07	4.00478e-06	6.86466
Tagln2	0.632569	5.42515	7.83121	2.59264e-07	4.01784e-06	6.86061
Chac1	0.9078	7.23948	7.8268	2.61392e-07	4.0479e-06	6.85228
Chrd	-0.60267	7.24747	-7.81784	2.65772e-07	4.10189e-06	6.83534
Rbm11	-1.00746	4.68807	-7.8147	2.67326e-07	4.122e-06	6.82939
Camkk1	-0.791387	9.62124	-7.81051	2.69416e-07	4.1453e-06	6.82146
Cldn23	1.38448	4.5662	7.8039	2.72741e-07	4.19346e-06	6.80896
Ndrg3	-0.794133	10.1498	-7.79718	2.76165e-07	4.24005e-06	6.79624
Zfp516	1.14876	6.01231	7.79453	2.7753e-07	4.25191e-06	6.79121
Snph	-0.61912	9.91935	-7.79279	2.7843e-07	4.26265e-06	6.78791
Cbx6	-0.615389	10.1883	-7.78999	2.79882e-07	4.2788e-06	6.78261
Tmem59l	-0.860789	10.7017	-7.77534	2.87612e-07	4.3814e-06	6.75484
Slit1	-0.714879	8.38855	-7.76733	2.91933e-07	4.43779e-06	6.73964
Slc12a5	-1.01238	9.24539	-7.75722	2.97482e-07	4.51061e-06	6.72045
Ncdn	-0.684644	12.1545	-7.75676	2.97739e-07	4.51061e-06	6.71957
LOC102641248	-0.932994	5.9474	-7.74568	3.03952e-07	4.59452e-06	6.69852
Rbpj	0.638265	7.68655	7.74445	3.04648e-07	4.60181e-06	6.69618
Ly6c2	0.866062	10.3906	7.74336	3.0527e-07	4.60796e-06	6.69411
Arel1	-0.604949	8.63305	-7.73914	3.07685e-07	4.64116e-06	6.68607
Adssl1	0.601344	7.3332	7.71656	3.20933e-07	4.81736e-06	6.6431
Prokr2	1.07407	5.69508	7.71273	3.23242e-07	4.84526e-06	6.63579
Gla	0.725925	4.76343	7.69966	3.31236e-07	4.94784e-06	6.61089
Hcar2	0.962922	5.32186	7.69567	3.33719e-07	4.97801e-06	6.60328
Nim1k	-0.666945	6.58457	-7.69459	3.34394e-07	4.98462e-06	6.60122
Hnmt	-1.02582	7.78979	-7.69125	3.36494e-07	5.00567e-06	6.59484
Cfap97	-0.957277	5.99054	-7.69066	3.36867e-07	5.00761e-06	6.59371
Rbfox3	-0.64014	9.43677	-7.68895	3.37944e-07	5.01224e-06	6.59046
Cnn3	0.846234	9.47326	7.68571	3.40004e-07	5.03684e-06	6.58426
Rorb	0.870698	6.36611	7.6776	3.45205e-07	5.10685e-06	6.56879
Gm5085	-0.753784	4.14963	-7.67208	3.48797e-07	5.15607e-06	6.55824
Fst	0.89148	4.58261	7.67175	3.49012e-07	5.15607e-06	6.55761
Tinf2	1.4296	6.7391	7.67035	3.4993e-07	5.16608e-06	6.55493
C130051F05Rik	-0.621648	5.61976	-7.66867	3.51038e-07	5.17889e-06	6.55171
Otud1	0.894501	7.06413	7.66562	3.53047e-07	5.20071e-06	6.54589
Dazl	-0.986451	5.22055	-7.66533	3.53242e-07	5.20071e-06	6.54533
9630005C17Rik	-0.737772	5.95317	-7.65829	3.57936e-07	5.26261e-06	6.53188
Fam126b	0.647656	9.89994	7.65589	3.59553e-07	5.27613e-06	6.52728
Blnk	2.33903	7.89302	7.65583	3.59591e-07	5.27613e-06	6.52717
Glt8d2	-0.595309	4.93687	-7.65302	3.61493e-07	5.29321e-06	6.5218
Pygo1	-0.689656	4.81391	-7.64909	3.64176e-07	5.32885e-06	6.51426
Pmepa1	1.32339	7.38487	7.64293	3.6841e-07	5.37984e-06	6.50248
Trmt61b	1.71	7.60772	7.6415	3.69399e-07	5.38696e-06	6.49974
Ythdc1	0.647607	9.19924	7.63852	3.71479e-07	5.40997e-06	6.49402
Lypd6	-0.947126	5.50324	-7.62485	3.81144e-07	5.52826e-06	6.46784
Casd1	-0.71688	8.08367	-7.62103	3.83899e-07	5.56072e-06	6.4605
Pmaip1	1.6052	5.10237	7.61423	3.88839e-07	5.62849e-06	6.44747
BC048403	-0.667124	5.84094	-7.60964	3.92215e-07	5.66972e-06	6.43866
Zdbf2	1.50993	8.38931	7.57542	4.18356e-07	5.99523e-06	6.37289
Slc30a3	-0.651059	8.70069	-7.56742	4.24727e-07	6.07246e-06	6.35748
Tma16	0.634937	6.37813	7.55601	4.33976e-07	6.19431e-06	6.33553
Gjb2	1.12926	7.63456	7.55069	4.38369e-07	6.24458e-06	6.32526
Smim10l2a	-0.713868	6.01717	-7.5497	4.39188e-07	6.24797e-06	6.32336
Cntn3	0.834414	6.43975	7.53727	4.49642e-07	6.38402e-06	6.29938
Nsg2	-0.657491	9.1744	-7.53515	4.51447e-07	6.40415e-06	6.2953
Gprc5a	1.07003	5.83625	7.53369	4.52697e-07	6.4147e-06	6.29248
Tceal1	-0.786599	8.81112	-7.52789	4.577e-07	6.48131e-06	6.28128
Gnl3	0.599338	8.41534	7.52423	4.60882e-07	6.51541e-06	6.27422
Amph	-0.645276	10.3435	-7.5219	4.62923e-07	6.53806e-06	6.26971
Pclo	-0.657857	8.03587	-7.51808	4.66288e-07	6.57696e-06	6.26233
Lyar	0.590667	7.0208	7.51378	4.701e-07	6.62203e-06	6.25403
Rsl1	-0.599526	5.95519	-7.51299	4.70807e-07	6.62766e-06	6.2525
Jph3	-0.828146	8.78954	-7.51181	4.71859e-07	6.63812e-06	6.25023
C530005A16Rik	-0.598148	5.04747	-7.50191	4.80804e-07	6.73414e-06	6.23108
Fyco1	-0.745133	6.8819	-7.50115	4.81496e-07	6.73414e-06	6.22962
5730414N17Rik	-0.782757	4.90604	-7.49779	4.84579e-07	6.75996e-06	6.22311
Srl	-0.695583	6.7842	-7.49634	4.85917e-07	6.76947e-06	6.2203
C030023E24Rik	-1.10022	5.70924	-7.48558	4.9595e-07	6.88695e-06	6.19947
Zfp827	-0.687027	6.72898	-7.48392	4.97514e-07	6.90421e-06	6.19626
Zfpm1	-0.822087	6.32875	-7.48068	5.00589e-07	6.92901e-06	6.18998
Rbbp9	-0.596703	7.70201	-7.47626	5.0481e-07	6.97396e-06	6.18143
B230303A05Rik	-1.62702	5.66789	-7.46505	5.15681e-07	7.07869e-06	6.15971
Reps1	0.596912	8.61894	7.45028	5.30386e-07	7.24355e-06	6.13105
Ccl3	2.94518	7.0215	7.44855	5.32145e-07	7.25892e-06	6.12768
AI646383	1.00384	6.02045	7.44539	5.35353e-07	7.2975e-06	6.12155
Tmem196	-0.641444	5.78588	-7.44454	5.3622e-07	7.30469e-06	6.1199
Scaper	-0.807226	5.74796	-7.42284	5.58876e-07	7.55589e-06	6.07772
Wnt2	-1.14542	5.60841	-7.41974	5.62185e-07	7.58424e-06	6.07171
Gdpd5	0.594937	7.64065	7.41164	5.70948e-07	7.66981e-06	6.05594
D18Ertd232e	0.634679	3.2747	7.40677	5.76287e-07	7.72333e-06	6.04646
Alox12b	-1.41628	4.95352	-7.40541	5.77786e-07	7.73859e-06	6.04381
Fga	0.818934	3.36623	7.40068	5.8303e-07	7.78943e-06	6.0346
2610044O15Rik8	-0.773774	5.49266	-7.39305	5.916e-07	7.88434e-06	6.01973
Pkp2	-1.19354	6.18921	-7.3917	5.93125e-07	7.89977e-06	6.01711
Synpr	-1.16691	10.1551	-7.38855	5.96714e-07	7.92792e-06	6.01096
Vstm5	-0.881029	6.28885	-7.37823	6.08614e-07	8.07107e-06	5.99083
Zfp593	0.618746	6.09515	7.37364	6.13984e-07	8.13226e-06	5.98188
Gpr68	-0.689914	7.31041	-7.3724	6.15443e-07	8.14156e-06	5.97946
Chga	0.788029	8.78478	7.36759	6.21147e-07	8.20189e-06	5.97006
Lancl1	-0.59099	8.90283	-7.36627	6.22718e-07	8.21255e-06	5.96748
Gm4070	1.07934	6.34275	7.35986	6.30412e-07	8.29875e-06	5.95497
Igsf6	0.586984	4.02332	7.35728	6.33539e-07	8.32464e-06	5.94993
Steap4	0.732215	5.4186	7.35612	6.34953e-07	8.32831e-06	5.94766
Hapln2	0.697209	6.92694	7.35609	6.3498e-07	8.32831e-06	5.94761
E130110O22Rik	-0.773565	5.37259	-7.35351	6.38137e-07	8.36462e-06	5.94256
Gm5637	0.790895	7.14849	7.3496	6.4293e-07	8.41206e-06	5.93493
Tub	-0.754036	6.99711	-7.34597	6.47426e-07	8.45617e-06	5.92783
AI120166	0.637516	6.75206	7.34463	6.49099e-07	8.46702e-06	5.9252
E130311K13Rik	-0.690108	7.2202	-7.34378	6.50151e-07	8.4756e-06	5.92355
Pnmal1	-0.934114	5.46287	-7.33932	6.55739e-07	8.5381e-06	5.91483
Fstl1	0.597414	8.09143	7.3312	6.66045e-07	8.65375e-06	5.89893
Gcc2	-0.70433	6.48683	-7.33106	6.6623e-07	8.65375e-06	5.89865
Il2rg	1.19008	5.71578	7.31841	6.82613e-07	8.85051e-06	5.87389
9330199C07Rik	-0.692257	6.40332	-7.31634	6.85337e-07	8.87514e-06	5.86983
Cdc42ep3	0.623574	6.14678	7.31437	6.87937e-07	8.8874e-06	5.86598
Tmem178	0.676704	9.79141	7.30692	6.97874e-07	8.99956e-06	5.85136
Grm2	-0.878107	8.30656	-7.29937	7.0809e-07	9.12583e-06	5.83655
Zfyve28	-0.606893	7.06033	-7.29293	7.16912e-07	9.2279e-06	5.82393
Plekhg2	1.01506	6.01767	7.28326	7.30399e-07	9.35171e-06	5.80494
9330171B17Rik	-0.68155	4.53395	-7.27793	7.37938e-07	9.4258e-06	5.79447
Tmem45a	0.634117	5.35917	7.2751	7.41985e-07	9.46064e-06	5.7889
Dsc1	2.47491	3.98279	7.26736	7.53133e-07	9.59141e-06	5.7737
C80998	0.877963	5.71253	7.25114	7.77093e-07	9.86734e-06	5.74179
Usp38	0.622054	6.82529	7.24558	7.85484e-07	9.95625e-06	5.73085
Tal1	0.641784	5.68175	7.24134	7.9195e-07	1.00087e-05	5.72249
Tbc1d8b	0.742409	5.6382	7.2372	7.98306e-07	1.00713e-05	5.71435
B230216N24Rik	0.70493	5.08411	7.23567	8.00677e-07	1.00894e-05	5.71132
4930570G19Rik	-0.791032	4.87691	-7.23457	8.02377e-07	1.01036e-05	5.70916
Dpysl3	0.767161	7.0427	7.23433	8.02748e-07	1.01036e-05	5.70869
Tpbg	1.74638	5.11121	7.23082	8.08218e-07	1.01547e-05	5.70177
Kcnq5	-0.856104	6.5717	-7.22906	8.1097e-07	1.01773e-05	5.69831
Wdr17	-0.635209	6.03083	-7.221	8.23728e-07	1.03134e-05	5.6824
Efna3	-0.653457	7.56747	-7.21152	8.38985e-07	1.048e-05	5.6637
Haghl	-0.662786	8.06597	-7.21	8.41458e-07	1.04987e-05	5.6607
Nalcn	-0.782988	8.53882	-7.20726	8.4593e-07	1.05484e-05	5.6553
Usp11	-0.640014	8.76388	-7.19988	8.58118e-07	1.06756e-05	5.64072
Gabra5	-0.78637	9.5976	-7.19891	8.59726e-07	1.06833e-05	5.63881
Slc25a16	-0.594416	8.22775	-7.19661	8.6358e-07	1.07249e-05	5.63426
Nrarp	-0.652017	7.36064	-7.19069	8.73549e-07	1.08288e-05	5.62256
Pmp22	0.799594	8.27441	7.18709	8.79659e-07	1.0893e-05	5.61546
Itpripl2	0.864843	6.97864	7.18681	8.8015e-07	1.0893e-05	5.61489
Mt2	1.02182	12.204	7.1847	8.83757e-07	1.09251e-05	5.61072
Homer2	-0.884305	8.01032	-7.17994	8.91958e-07	1.10201e-05	5.60131
Gria1	-0.843901	10.3161	-7.1719	9.05984e-07	1.11613e-05	5.58541
Runx1t1	-0.71786	5.74142	-7.17114	9.07333e-07	1.1171e-05	5.5839
D230044B12Rik	-0.639255	6.10579	-7.17087	9.07802e-07	1.1171e-05	5.58337
Kcng1	-0.658257	4.52203	-7.16732	9.14087e-07	1.12354e-05	5.57634
Tbc1d32	-0.714035	6.18857	-7.15993	9.27316e-07	1.1372e-05	5.5617
Sema3g	0.794931	5.89546	7.15654	9.33445e-07	1.14342e-05	5.55499
Dbp	-1.36964	8.13756	-7.14941	9.46474e-07	1.1574e-05	5.54086
Nat8l	-0.624558	8.70525	-7.14324	9.579e-07	1.16805e-05	5.52863
Lmo3	-0.833528	9.17336	-7.13924	9.65385e-07	1.17518e-05	5.5207
Lox	0.62469	4.22739	7.13706	9.69487e-07	1.17866e-05	5.51638
Cldn22	-0.684534	5.80837	-7.13649	9.70574e-07	1.17883e-05	5.51524
Gm10699	-0.739681	6.18594	-7.12942	9.84031e-07	1.19114e-05	5.50121
Esm1	0.724974	2.96845	7.12532	9.91912e-07	1.19731e-05	5.49308
Ada	0.838902	4.61226	7.12146	9.99401e-07	1.20365e-05	5.48542
Gabrg2	-0.754044	9.26406	-7.1171	1.00793e-06	1.21012e-05	5.47676
Lif	1.08877	4.68775	7.11699	1.00816e-06	1.21012e-05	5.47653
Serpine1	3.13621	6.90161	7.11437	1.01331e-06	1.21564e-05	5.47134
Tmem169	-0.610959	7.1194	-7.0976	1.04702e-06	1.25258e-05	5.438
Atrn	-0.622316	7.6899	-7.09049	1.06166e-06	1.26587e-05	5.42384
Klhl24	-0.783026	6.04556	-7.08708	1.06875e-06	1.27362e-05	5.41706
Ryr2	-0.926508	7.14854	-7.07935	1.08502e-06	1.29086e-05	5.40167
Prr36	-0.880849	7.11858	-7.06831	1.1087e-06	1.3154e-05	5.37968
Samsn1	0.77354	4.57013	7.06792	1.10954e-06	1.31567e-05	5.3789
Plekhg5	-0.585458	8.72665	-7.05979	1.12734e-06	1.33091e-05	5.36269
2210008F06Rik	-0.743424	5.07804	-7.04151	1.16843e-06	1.37413e-05	5.32622
Itpka	-0.876782	9.89576	-7.03947	1.17311e-06	1.37888e-05	5.32215
Pkia	-0.716078	9.34897	-7.03413	1.18545e-06	1.38973e-05	5.31148
Cd68	1.42895	7.12883	7.03408	1.18557e-06	1.38973e-05	5.31138
Tnc	1.47349	5.35945	7.03314	1.18776e-06	1.39079e-05	5.3095
Rnd1	0.663578	5.71164	7.02995	1.19521e-06	1.39875e-05	5.30313
Cwh43	0.621541	5.23297	7.02912	1.19716e-06	1.3995e-05	5.30147
Camk2a	-1.03734	8.71696	-7.02343	1.2106e-06	1.41368e-05	5.29009
Galntl6	-1.13916	5.30919	-7.02132	1.21564e-06	1.41728e-05	5.28587
Irx3	0.767584	4.57213	7.01762	1.22448e-06	1.42679e-05	5.27848
Mfsd4b4	-0.723502	5.30264	-7.01343	1.23461e-06	1.43781e-05	5.27009
Mpp2	-0.821354	8.00248	-7.01009	1.24273e-06	1.44649e-05	5.26341
Vwa3b	-0.643395	5.34992	-7.00696	1.25038e-06	1.45382e-05	5.25716
Mapk6	0.623445	6.30966	6.99242	1.28664e-06	1.48794e-05	5.22804
Itm2a	-0.655987	9.02466	-6.99051	1.29148e-06	1.49193e-05	5.22421
Tchh	0.944432	4.34751	6.9813	1.31511e-06	1.51597e-05	5.20575
Dusp6	0.786169	9.36428	6.98059	1.31694e-06	1.51646e-05	5.20432
Cd300lf	0.743905	4.99128	6.97828	1.32293e-06	1.52173e-05	5.1997
Kcns2	-0.769304	6.85804	-6.97639	1.32786e-06	1.52468e-05	5.19591
Rexo2	0.585074	8.6613	6.9719	1.33966e-06	1.53603e-05	5.18691
Cd244	0.641218	2.78563	6.96888	1.34764e-06	1.54191e-05	5.18085
Hmgcll1	-0.603131	6.74846	-6.96751	1.3513e-06	1.54445e-05	5.17809
Megf9	-1.04501	7.95994	-6.96452	1.35929e-06	1.5511e-05	5.17209
Pabpc4	0.71183	8.435	6.94824	1.40361e-06	1.59407e-05	5.1394
Rps6ka5	-0.821155	5.36482	-6.94762	1.40533e-06	1.59518e-05	5.13815
Gpx1	0.679942	9.80282	6.94529	1.41181e-06	1.59831e-05	5.13347
Ptchd1	0.844104	5.6945	6.94419	1.41486e-06	1.60093e-05	5.13127
Aldh1a3	1.2165	4.34492	6.93967	1.42755e-06	1.61204e-05	5.12218
Efnb2	0.632798	6.58185	6.93962	1.42768e-06	1.61204e-05	5.12208
Ppm1k	-0.875105	7.91968	-6.93404	1.44351e-06	1.6265e-05	5.11085
Cxx1c	-0.752236	9.03354	-6.9279	1.4611e-06	1.64374e-05	5.09851
Gpr155	-0.652614	9.05791	-6.9256	1.46777e-06	1.65038e-05	5.09387
Id2	0.951634	8.41516	6.92473	1.4703e-06	1.65149e-05	5.09212
S100a10	1.36564	7.33698	6.92035	1.48306e-06	1.66409e-05	5.08332
Fam163b	-0.74926	6.73398	-6.91962	1.4852e-06	1.66562e-05	5.08185
Abcc8	-1.06526	6.16465	-6.91675	1.49366e-06	1.67297e-05	5.07606
Ppp1r15b	0.693181	6.82791	6.91634	1.49486e-06	1.67297e-05	5.07524
Amotl1	0.787165	6.15325	6.91137	1.50962e-06	1.68685e-05	5.06524
Prss23	0.710939	7.15456	6.90723	1.52203e-06	1.69807e-05	5.0569
Osbpl6	0.606051	5.96221	6.90391	1.53208e-06	1.70751e-05	5.0502
Ms4a6d	1.60988	4.53949	6.89825	1.54933e-06	1.72496e-05	5.03879
Ano8	-0.641493	5.79358	-6.88997	1.57493e-06	1.74893e-05	5.0221
Cenpw	-0.650983	4.75461	-6.88593	1.58757e-06	1.76115e-05	5.01396
Lrg1	1.48001	6.64696	6.87832	1.61171e-06	1.78242e-05	4.99859
Slc27a2	-0.925594	5.21616	-6.87625	1.61832e-06	1.7888e-05	4.99442
Gm4024	0.871606	7.68739	6.87581	1.61973e-06	1.78904e-05	4.99354
5730409E04Rik	-0.79361	8.84068	-6.86871	1.64271e-06	1.80925e-05	4.97919
Ppm1h	0.615373	8.09198	6.86605	1.65139e-06	1.81695e-05	4.97382
Camk1d	-0.790636	7.18652	-6.86229	1.66375e-06	1.82868e-05	4.96622
Mob3a	0.59494	5.7521	6.8608	1.66869e-06	1.83317e-05	4.9632
Cd300lb	0.64879	3.66215	6.85822	1.67726e-06	1.84051e-05	4.95799
Fam43a	0.673804	7.37837	6.85818	1.67738e-06	1.84051e-05	4.95791
Siah2	1.22857	7.28969	6.8579	1.67832e-06	1.84051e-05	4.95735
Me3	-0.777534	7.41101	-6.85387	1.69178e-06	1.85286e-05	4.94921
Sap18b	0.92405	9.45918	6.85196	1.69823e-06	1.85591e-05	4.94533
Kcnip2	-1.1096	7.59622	-6.84879	1.70895e-06	1.86313e-05	4.93892
Mafk	0.659223	7.77795	6.84692	1.71531e-06	1.86912e-05	4.93514
Robo4	0.862684	6.01976	6.84379	1.72599e-06	1.87789e-05	4.92882
Gch1	0.644643	4.97128	6.83637	1.75163e-06	1.90003e-05	4.9138
Ddx21	0.89311	6.86045	6.82939	1.77612e-06	1.91981e-05	4.89966
Gm6682	0.800312	5.17216	6.82771	1.78205e-06	1.92526e-05	4.89627
Crispld1	-0.717572	5.31167	-6.81712	1.82001e-06	1.96036e-05	4.8748
Cdyl	0.911153	6.6627	6.8128	1.8357e-06	1.9743e-05	4.86606
Mirg	0.620474	7.2523	6.81014	1.84547e-06	1.98183e-05	4.86066
Gm38654	0.905221	5.87739	6.79929	1.88577e-06	2.01806e-05	4.83865
Acot13	-0.719035	9.49933	-6.79395	1.90597e-06	2.03765e-05	4.82781
Rps6ka6	0.672385	5.01512	6.78696	1.9327e-06	2.06314e-05	4.81363
Slc16a1	0.736672	6.80252	6.78525	1.93931e-06	2.06832e-05	4.81015
Abcb1a	-0.616351	6.57508	-6.76745	2.00944e-06	2.13132e-05	4.77397
Galnt15	1.05989	5.46771	6.74839	2.08744e-06	2.19989e-05	4.7352
Adcyap1r1	-0.589097	6.9924	-6.74816	2.08842e-06	2.19989e-05	4.73472
Rras2	0.589172	8.4717	6.73877	2.12799e-06	2.23283e-05	4.71561
Neb	1.15751	3.4784	6.73329	2.15147e-06	2.25417e-05	4.70443
Dtwd1	-0.688917	7.58669	-6.72085	2.20575e-06	2.29984e-05	4.67907
LOC552906	1.3222	6.47562	6.70798	2.26335e-06	2.35419e-05	4.65282
Cda	1.14129	5.67866	6.70485	2.27761e-06	2.36559e-05	4.64643
Avpr1a	0.60995	4.04186	6.70236	2.28903e-06	2.37631e-05	4.64133
Nhsl2	-1.35865	6.88003	-6.69942	2.30255e-06	2.38688e-05	4.63534
Enpep	0.605391	5.50207	6.69453	2.32526e-06	2.40695e-05	4.62535
Tes	0.708603	4.97989	6.69279	2.33337e-06	2.41302e-05	4.6218
Ppp1r3c	0.860704	9.284	6.69191	2.33749e-06	2.4138e-05	4.62
Pdxp	-0.751649	9.9845	-6.67989	2.3946e-06	2.46331e-05	4.59543
Snx32	-0.655258	7.55213	-6.67944	2.39678e-06	2.46389e-05	4.5945
Cd53	0.585617	5.17724	6.67796	2.40394e-06	2.4682e-05	4.59147
Gm26588	-0.749325	6.34661	-6.67371	2.42453e-06	2.48368e-05	4.58279
Cpeb1	-0.727888	8.12685	-6.67334	2.42635e-06	2.48368e-05	4.58202
Grm5	-0.935527	8.38987	-6.67319	2.42705e-06	2.48368e-05	4.58173
Irgm2	0.900268	5.7492	6.67209	2.43243e-06	2.48559e-05	4.57947
Extl1	-0.934547	7.03286	-6.67127	2.43646e-06	2.48852e-05	4.57779
Helz2	1.09575	5.44354	6.67006	2.44237e-06	2.49337e-05	4.57532
Mn1	0.686266	7.62341	6.66947	2.44527e-06	2.49515e-05	4.57411
4930422N03Rik	0.642127	4.1074	6.66642	2.46033e-06	2.50615e-05	4.56786
Acot5	-0.717906	4.34407	-6.66378	2.47339e-06	2.51549e-05	4.56247
4933431E20Rik	-0.699751	6.93073	-6.66209	2.48182e-06	2.52092e-05	4.55901
Kcna2	-0.939048	7.20884	-6.66201	2.48225e-06	2.52092e-05	4.55884
Nlgn1	-0.612696	5.00234	-6.65704	2.50719e-06	2.54026e-05	4.54866
Tmem132d	-0.599106	5.54799	-6.6549	2.51798e-06	2.54908e-05	4.54429
Zfp141	-0.655439	5.63065	-6.65391	2.52301e-06	2.54908e-05	4.54226
Atl1	-0.593066	9.53934	-6.65114	2.5371e-06	2.55731e-05	4.53658
Tnr	-0.779352	8.55492	-6.65042	2.54079e-06	2.55983e-05	4.53511
Zfp273	-0.887222	5.78245	-6.64761	2.55523e-06	2.56956e-05	4.52934
AI593442	-0.952996	8.72551	-6.64611	2.56294e-06	2.57506e-05	4.52627
Gm36457	-0.646838	4.28345	-6.64326	2.57766e-06	2.58644e-05	4.52044
Asb13	-0.58819	7.08476	-6.64319	2.57803e-06	2.58644e-05	4.52029
Dhrs3	0.610121	7.33305	6.63316	2.63063e-06	2.62941e-05	4.49973
Lypd1	-0.860325	7.0566	-6.6327	2.63309e-06	2.63064e-05	4.49878
Dleu7	-0.723922	5.95994	-6.61324	2.73848e-06	2.72236e-05	4.45884
Flna	0.89342	7.92584	6.61318	2.73881e-06	2.72236e-05	4.45871
Gm2115	-0.853291	7.42499	-6.60361	2.79221e-06	2.76394e-05	4.43905
Pnp2	0.623757	7.16243	6.60312	2.795e-06	2.76416e-05	4.43804
BC030500	-1.04113	6.28182	-6.60255	2.79819e-06	2.76604e-05	4.43688
Rnf138rt1	1.24678	4.95546	6.59889	2.81893e-06	2.78271e-05	4.42936
Ica1l	-0.920479	5.69634	-6.59522	2.83995e-06	2.79704e-05	4.4218
Gria4	-0.626055	6.50931	-6.59355	2.84951e-06	2.80388e-05	4.41838
Kcnc2	-1.14996	9.14274	-6.58928	2.87424e-06	2.82306e-05	4.40958
Astn1	-0.734706	9.48359	-6.58631	2.89155e-06	2.83497e-05	4.40347
Rapgefl1	-0.89348	5.99218	-6.58497	2.89937e-06	2.83996e-05	4.40072
Hist1h1c	0.661187	7.98409	6.58385	2.90596e-06	2.84398e-05	4.39841
Sgk1	1.09327	10.7209	6.57772	2.94219e-06	2.87143e-05	4.3858
C2cd4b	0.828199	7.8495	6.57675	2.94795e-06	2.87576e-05	4.38381
Tinagl1	1.3983	7.2661	6.57523	2.95701e-06	2.88328e-05	4.38069
Fam49a	-0.601719	8.66737	-6.57361	2.96674e-06	2.8883e-05	4.37734
Ralyl	-0.602283	9.24207	-6.56882	2.99561e-06	2.91037e-05	4.36749
Snrpa1	0.760825	8.61908	6.56797	3.0008e-06	2.91278e-05	4.36573
2022-03-11	0.694386	5.32456	6.56366	3.02706e-06	2.93034e-05	4.35686
Il34	-0.801371	6.44521	-6.56104	3.04319e-06	2.9433e-05	4.35145
Fndc3a	0.636913	7.17835	6.55845	3.05921e-06	2.95746e-05	4.34611
Ak6	0.600367	8.207	6.55612	3.07363e-06	2.97007e-05	4.34132
Pcdhgc4	0.619637	5.4105	6.55517	3.07954e-06	2.97445e-05	4.33937
Gm2590	0.760245	7.12766	6.5521	3.09877e-06	2.98975e-05	4.33303
Eif2s2	0.632552	8.58614	6.54538	3.1413e-06	3.0273e-05	4.31916
Tgfbi	1.5227	6.84785	6.5431	3.15582e-06	3.03654e-05	4.31447
Xrcc6bp1	-0.672371	5.77066	-6.54299	3.15653e-06	3.03654e-05	4.31424
Slmap	-0.70266	6.83692	-6.53374	3.21627e-06	3.0871e-05	4.29516
C3	0.788455	4.60472	6.5325	3.22435e-06	3.09287e-05	4.2926
Tnfaip6	0.604855	7.33398	6.53238	3.22516e-06	3.09287e-05	4.29235
Crybg3	1.00065	6.43746	6.53041	3.23806e-06	3.10386e-05	4.28829
Gm4988	-0.707326	5.35154	-6.52619	3.26591e-06	3.12499e-05	4.27957
Cenpl	0.980285	3.7534	6.5237	3.28249e-06	3.13946e-05	4.27442
Eif4ebp1	0.748242	5.86033	6.51998	3.30735e-06	3.15515e-05	4.26674
Rrm2b	-0.585881	5.72669	-6.51497	3.3412e-06	3.17724e-05	4.25638
Edem1	0.708384	7.0541	6.51386	3.34873e-06	3.18299e-05	4.25409
Slc25a24	0.701782	4.83645	6.50981	3.37634e-06	3.20357e-05	4.24573
D930016D06Rik	0.64162	7.73343	6.498	3.45839e-06	3.26846e-05	4.2213
Auh	0.655642	5.60315	6.4889	3.52301e-06	3.31496e-05	4.20246
Hist1h2br	0.61443	7.32085	6.48316	3.56438e-06	3.34656e-05	4.19058
Mfsd4a	-0.911063	6.82282	-6.48154	3.57611e-06	3.35465e-05	4.18724
Shroom2	-1.04676	8.29982	-6.47264	3.64151e-06	3.40708e-05	4.1688
Ttc14	-0.589375	6.78742	-6.46489	3.69943e-06	3.45227e-05	4.15274
Frmd8	0.677577	7.92616	6.45713	3.75844e-06	3.49326e-05	4.13664
Cacna1b	-0.615718	7.12546	-6.45275	3.79218e-06	3.51898e-05	4.12755
Adcy8	0.68272	5.88643	6.44238	3.87323e-06	3.58152e-05	4.10603
Tax1bp3	0.594944	7.33061	6.4407	3.8865e-06	3.58773e-05	4.10256
Sh3glb2	-0.62665	9.19002	-6.43672	3.91821e-06	3.6141e-05	4.09429
Wee1	-0.666789	6.41811	-6.43608	3.92335e-06	3.61728e-05	4.09295
Stk26	-0.860561	5.702	-6.43008	3.97166e-06	3.65088e-05	4.0805
Cstad	-0.731319	5.48853	-6.42967	3.97505e-06	3.65243e-05	4.07963
Mcam	0.626084	6.67806	6.42749	3.99273e-06	3.6671e-05	4.07512
Arrdc3	0.657003	8.75391	6.42378	4.0231e-06	3.69185e-05	4.06741
LOC102638110	1.02262	8.08104	6.41589	4.08854e-06	3.7487e-05	4.051
Gfra4	-0.586675	7.56234	-6.41267	4.11553e-06	3.77023e-05	4.0443
Egfl6	-0.999351	4.23592	-6.39463	4.27023e-06	3.89345e-05	4.00677
9330121K16Rik	-0.732338	7.75201	-6.39204	4.29293e-06	3.90944e-05	4.00137
Glipr2	1.05195	6.1051	6.38995	4.31131e-06	3.92451e-05	3.99703
Trim56	0.67965	5.88192	6.38778	4.33055e-06	3.93703e-05	3.9925
Doc2b	-0.921914	8.51904	-6.38737	4.3342e-06	3.93869e-05	3.99164
Homer3	-0.695645	7.57722	-6.38507	4.35463e-06	3.95141e-05	3.98686
Stum	-1.07285	10.7449	-6.38235	4.37898e-06	3.96765e-05	3.98119
E230008J23Rik	-0.742232	6.94255	-6.38184	4.38354e-06	3.96793e-05	3.98013
Pde3b	0.785502	7.89194	6.3817	4.38483e-06	3.96793e-05	3.97983
Tgfb1i1	0.613189	7.71031	6.38143	4.38723e-06	3.96843e-05	3.97927
Stc1	0.738801	5.50431	6.38057	4.39498e-06	3.97241e-05	3.97748
Hs3st4	-0.80488	9.02281	-6.37572	4.4389e-06	4.00675e-05	3.96736
Hspa12a	-0.833613	6.98079	-6.35989	4.58531e-06	4.12711e-05	3.93436
Dgkh	-0.789116	8.05386	-6.35971	4.58702e-06	4.12711e-05	3.93398
Amer3	-0.912335	7.5241	-6.34181	4.75867e-06	4.26141e-05	3.89661
Ephb6	-0.618177	7.62335	-6.33868	4.78939e-06	4.28178e-05	3.89007
Spp1	2.86419	8.35374	6.33343	4.84131e-06	4.32281e-05	3.8791
Lmo1	-0.931353	8.13856	-6.33084	4.86712e-06	4.34225e-05	3.8737
Elfn2	-0.756349	6.72946	-6.30946	5.08588e-06	4.52242e-05	3.82898
Sik1	1.06498	4.09078	6.28978	5.29626e-06	4.68624e-05	3.78777
A330008L17Rik	-0.741676	5.97014	-6.2812	5.3908e-06	4.7601e-05	3.76978
Nicn1	-0.667486	8.60451	-6.28062	5.39716e-06	4.76377e-05	3.76858
Rpp25	-1.02151	5.63217	-6.27563	5.45306e-06	4.80703e-05	3.7581
Endou	0.624039	6.23421	6.27525	5.45736e-06	4.80703e-05	3.7573
Ddx3y	0.647634	8.71703	6.26599	5.5626e-06	4.87975e-05	3.73788
6330418B08Rik	1.5193	6.19395	6.26225	5.60565e-06	4.90967e-05	3.73004
Capg	0.936631	4.45786	6.26223	5.60595e-06	4.90967e-05	3.72998
Gm1976	-0.773872	7.1613	-6.25737	5.66242e-06	4.94513e-05	3.71979
Atp6v1g2	-0.710748	11.5115	-6.25286	5.71547e-06	4.97329e-05	3.71031
Rpl13	0.86353	8.06459	6.25016	5.74738e-06	4.99499e-05	3.70465
Hist1h3d	0.699446	4.65076	6.24622	5.79436e-06	5.02973e-05	3.69638
Dlx6os1	-1.19352	5.18655	-6.24382	5.82321e-06	5.0507e-05	3.69133
Cnr1	-0.63228	8.37223	-6.24171	5.84858e-06	5.06657e-05	3.68691
Gcg	1.06778	3.5084	6.23465	5.9346e-06	5.12869e-05	3.67206
Trpc1	-0.636217	7.35885	-6.23302	5.95468e-06	5.13986e-05	3.66863
Zfp354b	-0.605359	4.68602	-6.2318	5.96966e-06	5.14659e-05	3.66607
Nr4a2	1.45934	7.7449	6.22634	6.03755e-06	5.19263e-05	3.65458
Lamp2	0.674978	8.93362	6.2231	6.07809e-06	5.21707e-05	3.64778
Gm10501	-0.82688	5.23248	-6.21882	6.13218e-06	5.2572e-05	3.63877
Nfkbia	0.809805	8.73565	6.21524	6.17777e-06	5.28996e-05	3.63124
Bmp2	0.670986	4.41851	6.21426	6.1904e-06	5.29867e-05	3.62916
Neurl1b	-0.737352	7.76626	-6.21335	6.202e-06	5.30457e-05	3.62726
Ablim3	-0.878466	6.03428	-6.20487	6.31193e-06	5.38341e-05	3.6094
Adamts4	0.959127	7.45182	6.20062	6.36775e-06	5.42063e-05	3.60045
Gpc4	0.642624	8.36067	6.1952	6.43965e-06	5.47497e-05	3.58904
Lamp5	-0.952269	8.85603	-6.19135	6.49133e-06	5.5083e-05	3.58091
Klf2	1.34954	7.53411	6.19132	6.49165e-06	5.5083e-05	3.58086
A630026N12Rik	-0.771864	6.00526	-6.1813	6.62806e-06	5.59974e-05	3.55972
4933411B09Rik	0.645762	2.9002	6.18033	6.64139e-06	5.60661e-05	3.55768
Zfp11	-0.589383	6.4544	-6.17721	6.68451e-06	5.63114e-05	3.5511
Il13ra1	0.871451	5.26973	6.17413	6.72743e-06	5.65704e-05	3.5446
Thpo	-0.613193	5.41797	-6.1724	6.75152e-06	5.67065e-05	3.54096
Matn2	-1.22322	7.70574	-6.16292	6.88579e-06	5.76093e-05	3.52095
Adgrl4	0.655019	7.4478	6.15476	7.00354e-06	5.84352e-05	3.50372
Cpeb3	0.755733	7.04725	6.15232	7.03916e-06	5.87097e-05	3.49856
Crlf1	-1.01704	8.77855	-6.15024	7.06969e-06	5.89124e-05	3.49416
5730455P16Rik	-0.713011	6.66126	-6.14088	7.20862e-06	5.97293e-05	3.47439
Scn4b	-0.79654	6.63331	-6.14036	7.21646e-06	5.97713e-05	3.47328
Trim47	1.02343	6.20512	6.13737	7.26141e-06	6.00742e-05	3.46697
Fam107b	1.57062	7.59889	6.13717	7.26451e-06	6.00768e-05	3.46654
Pcnx2	-0.692287	7.25603	-6.13358	7.31884e-06	6.05028e-05	3.45897
Gpr6	1.2554	4.15902	6.13135	7.35294e-06	6.07614e-05	3.45424
Zfp217	0.620778	5.38695	6.12531	7.44602e-06	6.14361e-05	3.44146
Jmjd1c	0.902866	8.42672	6.12455	7.45784e-06	6.14587e-05	3.43985
Rnf170	-0.668462	6.21134	-6.12441	7.45995e-06	6.14587e-05	3.43956
4833422C13Rik	0.990391	5.05638	6.1244	7.46019e-06	6.14587e-05	3.43953
Mkx	-0.621647	5.99988	-6.11731	7.57109e-06	6.2204e-05	3.42453
Galnt6	0.645298	5.83689	6.11553	7.59915e-06	6.23884e-05	3.42077
Carf	-0.621021	5.05233	-6.11524	7.60378e-06	6.24027e-05	3.42015
Pdlim4	1.19086	8.16768	6.11357	7.63034e-06	6.25967e-05	3.41661
Shisa7	-0.849498	7.10797	-6.08535	8.09278e-06	6.55223e-05	3.35682
Gfra1	1.22044	7.42162	6.07467	8.2752e-06	6.67916e-05	3.33418
Slc6a15	-0.73103	9.07808	-6.06594	8.42762e-06	6.77905e-05	3.31564
Spty2d1	1.06144	4.9504	6.06488	8.44626e-06	6.7892e-05	3.31339
Apold1	1.37827	6.52753	6.06299	8.47964e-06	6.80586e-05	3.30938
1700102P08Rik	0.589111	3.77633	6.0568	8.59022e-06	6.87779e-05	3.29622
Marveld2	0.679774	4.17887	6.05654	8.59485e-06	6.87779e-05	3.29567
Vstm2l	-0.59924	9.36302	-6.05489	8.62459e-06	6.89903e-05	3.29217
4122401K19Rik	0.687922	4.39848	6.04879	8.73517e-06	6.97711e-05	3.27922
Tunar	0.626436	6.05968	6.04496	8.80553e-06	7.02809e-05	3.27107
D230019N24Rik	0.602327	6.1831	6.03635	8.96556e-06	7.12409e-05	3.25278
Lrrc24	-0.718257	6.29506	-6.03572	8.97749e-06	7.13094e-05	3.25143
Camta2	-0.585767	10.5522	-6.03245	9.03913e-06	7.1746e-05	3.24448
Capn3	-1.27987	6.01491	-6.02821	9.11974e-06	7.22259e-05	3.23546
Hspa12b	0.605287	5.15854	6.02686	9.14558e-06	7.23772e-05	3.23259
Per3	-0.656861	5.25912	-6.01817	9.31354e-06	7.35172e-05	3.2141
3632451O06Rik	-0.942883	6.74278	-6.01708	9.33497e-06	7.36593e-05	3.21177
Gm5553	0.600067	7.4863	6.01648	9.34668e-06	7.36976e-05	3.21049
Dhtkd1	-0.666634	5.59022	-6.0139	9.39737e-06	7.4043e-05	3.205
Scn2b	-0.697559	8.22835	-6.01326	9.41004e-06	7.40886e-05	3.20363
Slc2a1	0.693729	9.33645	6.00482	9.57801e-06	7.51909e-05	3.18566
Mtmr7	-0.588155	8.32065	-6.00326	9.60947e-06	7.53041e-05	3.18233
Ndst4	-0.629076	4.73444	-5.99375	9.80299e-06	7.64548e-05	3.16208
Klf7	0.628226	7.74304	5.98347	1.0017e-05	7.7827e-05	3.14015
Pnmal2	-0.656355	7.82194	-5.98338	1.00187e-05	7.7827e-05	3.13997
Slc30a10	-0.717999	5.25093	-5.97693	1.01554e-05	7.87751e-05	3.12621
Dct	0.624918	4.8127	5.96749	1.03589e-05	7.98353e-05	3.10606
Tor3a	0.814393	5.26279	5.95091	1.07266e-05	8.23152e-05	3.07065
9330177L23Rik	-0.827029	6.51706	-5.94906	1.07683e-05	8.2561e-05	3.06671
Gm38532	0.70587	5.52556	5.94336	1.08984e-05	8.32767e-05	3.05452
Pappa2	0.625792	4.12472	5.94083	1.09566e-05	8.36324e-05	3.04911
Egr4	1.44984	7.95088	5.94047	1.09649e-05	8.36661e-05	3.04834
Rab3b	-0.637157	8.15212	-5.93539	1.10829e-05	8.44768e-05	3.03747
Slc2a6	-0.751594	6.30455	-5.93416	1.11117e-05	8.46659e-05	3.03484
Mmp12	1.17517	3.73589	5.92702	1.12801e-05	8.56758e-05	3.01957
AI836737	-0.638962	5.2611	-5.92426	1.13458e-05	8.60841e-05	3.01367
Pla2g4a	1.04993	6.18342	5.92339	1.13665e-05	8.6209e-05	3.01182
Cdc14b	0.886316	6.80134	5.92324	1.13703e-05	8.6209e-05	3.01148
Zdhhc18	0.727003	7.1358	5.91958	1.14583e-05	8.66932e-05	3.00365
Scamp1	-0.62284	9.64636	-5.91211	1.16403e-05	8.79151e-05	2.98766
Zfp658	-0.857291	4.28624	-5.90896	1.17178e-05	8.84383e-05	2.98092
Wfs1	-0.723415	9.72204	-5.90569	1.17989e-05	8.89881e-05	2.97392
Ecscr	1.23545	6.09918	5.90384	1.18451e-05	8.9243e-05	2.96995
Gbp2	1.32344	6.67333	5.90192	1.18931e-05	8.95731e-05	2.96584
Agpat9	0.62889	4.95049	5.89895	1.19679e-05	9.00415e-05	2.95948
Cpne9	-1.10999	6.4942	-5.89675	1.20235e-05	9.0334e-05	2.95477
Hist1h3i	2.22437	4.97109	5.88603	1.22989e-05	9.21456e-05	2.93178
Cyth1	-0.690213	7.54285	-5.88236	1.23945e-05	9.27649e-05	2.92392
Myd88	0.640651	6.88705	5.87161	1.26795e-05	9.46674e-05	2.90085
Phf21b	0.780547	5.79383	5.86822	1.27707e-05	9.50843e-05	2.89357
D5Wsu152e	0.639824	8.21934	5.86446	1.28725e-05	9.56767e-05	2.88551
D130043K22Rik	-0.862335	7.46219	-5.86426	1.2878e-05	9.5684e-05	2.88509
Clcn2	-0.612414	6.92442	-5.85838	1.30392e-05	9.66817e-05	2.87246
Evl	0.770984	7.13655	5.85469	1.31415e-05	9.73336e-05	2.86453
Scn8a	-0.621474	7.95544	-5.85233	1.32072e-05	9.76918e-05	2.85946
Sesn1	-0.686218	7.68061	-5.84895	1.33019e-05	9.83246e-05	2.85221
Reps2	-0.9691	7.83821	-5.84712	1.33538e-05	9.864e-05	2.84827
Ncf4	0.611414	5.33187	5.84132	1.35188e-05	9.97562e-05	2.8358
Adrb1	0.588433	8.01751	5.83188	1.37919e-05	0.000101389	2.81551
Hist1h3f	1.60447	5.21046	5.83015	1.38426e-05	0.000101692	2.81179
Mlh3	-0.6085	6.4415	-5.81223	1.43785e-05	0.000104948	2.77325
Hectd2	0.600034	6.05586	5.81064	1.4427e-05	0.000105179	2.76983
Mpeg1	0.677064	7.65567	5.80984	1.44515e-05	0.000105302	2.76811
Dnajb1	1.30606	9.43909	5.80219	1.46882e-05	0.000106666	2.75162
Pianp	-0.746628	7.54642	-5.79328	1.49687e-05	0.000108264	2.73243
Rgs1	0.745451	3.52907	5.78319	1.52929e-05	0.000110423	2.71069
Lin7c	-0.634189	8.56578	-5.77641	1.55149e-05	0.000111688	2.69607
Cpne6	-0.803696	11.0467	-5.77517	1.55561e-05	0.000111835	2.69338
Col19a1	-0.838178	5.53862	-5.77368	1.56052e-05	0.000112076	2.69018
Kcng4	-0.666016	4.94892	-5.76632	1.58516e-05	0.000113473	2.67429
Rasl11a	1.86308	6.99276	5.76564	1.58746e-05	0.000113593	2.67282
Akt3	-0.634282	7.96679	-5.76446	1.59143e-05	0.000113802	2.67029
Bcl6	0.605181	8.14748	5.75658	1.61834e-05	0.000115381	2.65328
Scn3b	-1.1805	9.3239	-5.75429	1.62624e-05	0.000115729	2.64834
Hspe1	0.621308	9.47955	5.75423	1.62644e-05	0.000115729	2.64821
E030042N06Rik	1.06113	6.29083	5.74672	1.65265e-05	0.000117283	2.632
Cyp4x1	-0.661441	6.11875	-5.74477	1.65955e-05	0.000117656	2.62777
Exph5	-0.783558	5.48272	-5.73513	1.69398e-05	0.000119782	2.60695
Cltc	0.703075	9.65759	5.72034	1.74823e-05	0.000123091	2.57498
Vim	1.32866	9.67398	5.71623	1.76361e-05	0.000123971	2.5661
Scai	-0.596318	6.50629	-5.71557	1.7661e-05	0.000124106	2.56466
Mbtps1	-0.601171	6.2017	-5.71385	1.7726e-05	0.0001244	2.56094
Lin7b	-0.889793	7.50791	-5.70186	1.81853e-05	0.000127085	2.535
Trh	0.6632	4.88419	5.69569	1.84264e-05	0.000128353	2.52164
Phxr4	-0.600343	6.55425	-5.69283	1.85397e-05	0.000129048	2.51543
Mir124a-1hg	-0.913414	8.85573	-5.68346	1.89145e-05	0.000131412	2.49514
Dnm1	-0.69621	10.9306	-5.68204	1.89718e-05	0.00013164	2.49207
Mybbp1a	0.659079	7.90892	5.68087	1.90195e-05	0.000131929	2.48952
Wwtr1	1.39603	7.28626	5.67401	1.93002e-05	0.000133488	2.47467
6330415B21Rik	-0.960876	6.47369	-5.67069	1.94378e-05	0.000134353	2.46747
Timp3	0.794737	7.1777	5.66767	1.95639e-05	0.000135095	2.46091
Il33	1.20109	9.20877	5.65957	1.99056e-05	0.000137102	2.44336
Abca8b	-0.597464	5.118	-5.65644	2.00397e-05	0.000137849	2.43656
1810026B05Rik	0.841706	6.79264	5.6549	2.01059e-05	0.000138216	2.43321
2700038G22Rik	0.666016	5.89905	5.65315	2.01812e-05	0.000138556	2.42942
Fgf13	-0.605078	9.75185	-5.64951	2.0339e-05	0.000139476	2.42153
Map2	0.629352	8.19873	5.63857	2.08212e-05	0.000142315	2.39777
Gpr65	0.951998	3.21748	5.63473	2.09933e-05	0.000143263	2.38943
Map2k6	0.808727	7.4065	5.63107	2.11585e-05	0.000144253	2.38149
Hpca	-1.03252	11.8648	-5.62897	2.12542e-05	0.000144676	2.37691
Col25a1	-0.62566	7.22538	-5.62734	2.13284e-05	0.000145044	2.37338
Ndc1	0.756445	6.60349	5.62673	2.13563e-05	0.000145188	2.37206
Scn1a	-0.651376	6.10613	-5.61931	2.16987e-05	0.000147283	2.35594
2010315B03Rik	-0.639288	6.77706	-5.61477	2.1911e-05	0.000148396	2.34607
Sorcs3	1.28311	8.47135	5.60792	2.22358e-05	0.000150076	2.33115
Mest	1.15978	7.52013	5.60752	2.22547e-05	0.000150157	2.33029
Mansc1	-0.688176	6.58101	-5.60677	2.22904e-05	0.00015035	2.32867
Ypel4	-0.909574	8.00565	-5.60263	2.24897e-05	0.000151504	2.31965
Sowahc	0.792771	8.00219	5.60088	2.25743e-05	0.000151822	2.31585
Faim2	-0.677311	8.73383	-5.60072	2.2582e-05	0.000151822	2.3155
Rasgrp1	-1.41898	8.99872	-5.59606	2.28092e-05	0.000153033	2.30536
D8Ertd56e	0.658806	3.9834	5.58309	2.34535e-05	0.000156575	2.27713
Gm4354	0.642275	8.49058	5.57843	2.36894e-05	0.000157923	2.26699
Ipw	-1.32961	6.98268	-5.57645	2.37905e-05	0.000158432	2.26267
Lrch2	-0.701038	6.59603	-5.57337	2.39486e-05	0.000159188	2.25597
Sort1	-0.62343	8.53673	-5.572	2.40192e-05	0.00015943	2.25298
Lrrc20	-0.680891	7.18136	-5.56846	2.42026e-05	0.000160381	2.24527
Lrrtm4	-0.86587	6.81319	-5.56735	2.42604e-05	0.000160513	2.24286
Atrx	-0.697872	6.55298	-5.56702	2.4278e-05	0.000160513	2.24212
Mpo	0.947199	4.42601	5.56691	2.42838e-05	0.000160513	2.24188
Fto	-0.71325	7.93184	-5.56549	2.43577e-05	0.000160913	2.2388
Ctsz	0.86289	8.63068	5.55817	2.47447e-05	0.000163019	2.22284
5730437C12Rik	0.610839	2.59335	5.55753	2.47787e-05	0.000163194	2.22144
Hcls1	0.65582	5.20671	5.54508	2.54519e-05	0.000166506	2.19429
Epha4	-1.13441	7.65917	-5.541	2.56764e-05	0.000167668	2.18539
Pnoc	0.661835	7.1383	5.53344	2.60975e-05	0.000170111	2.16891
Cd274	0.676248	5.0884	5.52231	2.67314e-05	0.000173661	2.14461
Camkk2	-0.780222	7.35465	-5.52093	2.68112e-05	0.000174075	2.14159
Rnh1	0.804845	9.05199	5.52078	2.68197e-05	0.000174077	2.14127
Cnksr2	-0.750816	7.28215	-5.50292	2.78733e-05	0.000179776	2.10224
P2ry6	1.03199	6.5896	5.5005	2.80194e-05	0.000180611	2.09695
Rbp4	0.609663	7.51732	5.49987	2.8057e-05	0.000180799	2.09559
Zfp647	-0.67172	6.78001	-5.49935	2.80889e-05	0.00018095	2.09444
Mrps6	1.0096	8.95074	5.49821	2.81577e-05	0.000181251	2.09196
Gfpt2	0.614559	7.47121	5.49118	2.85886e-05	0.000183674	2.07658
Rasl10a	-1.0359	8.52554	-5.48875	2.87388e-05	0.000184529	2.07128
Sorl1	-0.637968	9.44828	-5.48741	2.88223e-05	0.000184954	2.06834
Alg13	0.603226	5.21852	5.47428	2.96517e-05	0.000189485	2.03962
Atf5	0.741166	7.54753	5.47112	2.9855e-05	0.000190671	2.0327
Adam11	-0.601841	8.05542	-5.47086	2.9872e-05	0.000190723	2.03212
Rimbp2	-0.720838	7.97427	-5.46795	3.00601e-05	0.00019181	2.02577
Pcdh19	-0.858246	7.9562	-5.45053	3.12148e-05	0.000197945	1.98761
4930447M23Rik	-0.690491	5.50716	-5.44065	3.18896e-05	0.000201921	1.96596
Plekho1	0.591625	6.46946	5.44052	3.18981e-05	0.000201921	1.96569
Slc1a6	-0.631933	5.32333	-5.43293	3.2427e-05	0.000204727	1.94904
Pdlim5	0.693132	6.04093	5.42377	3.30767e-05	0.000208315	1.92896
Creb3l1	0.668215	6.53088	5.42369	3.30824e-05	0.000208315	1.92879
Arl4d	0.723032	5.86733	5.42079	3.32914e-05	0.000209569	1.92242
Slco1a4	-0.739671	8.47901	-5.41494	3.37159e-05	0.000211746	1.90959
Sp7	0.81984	5.75634	5.4133	3.38362e-05	0.000212377	1.90599
B3gat1	-0.655203	6.76365	-5.40142	3.4719e-05	0.000217158	1.87992
Syt3	-0.743597	7.43342	-5.3776	3.65618e-05	0.000226641	1.8276
Arl5b	0.880632	6.27384	5.37511	3.67599e-05	0.000227469	1.82213
Grin1	-0.686572	8.77378	-5.37017	3.71565e-05	0.000229402	1.81127
Ttc30a1	-0.694191	4.98204	-5.36196	3.78257e-05	0.000232466	1.79321
Tlr1	0.910505	4.60262	5.36164	3.7852e-05	0.000232561	1.79251
Hapln1	-1.27438	5.30476	-5.35024	3.88017e-05	0.000237446	1.76744
Mgp	0.804368	9.27338	5.34728	3.90528e-05	0.000238561	1.76092
D830012I24Rik	-0.587741	7.38879	-5.32906	4.06327e-05	0.000246826	1.72081
Nr1d2	-0.873802	8.46087	-5.32292	4.11791e-05	0.000249686	1.7073
Haus8	0.605228	5.79436	5.31768	4.16523e-05	0.000252165	1.69574
Spag4	0.61519	5.03135	5.31269	4.21069e-05	0.000254773	1.68477
Nr4a3	0.719741	6.92337	5.3093	4.24192e-05	0.000256337	1.67729
Trf	0.869765	10.9519	5.30583	4.2742e-05	0.000257818	1.66963
Mmp3	0.85626	4.04997	5.30373	4.2938e-05	0.000258856	1.665
Ahnak2	0.825861	4.76276	5.30308	4.29982e-05	0.000259092	1.66358
Hs3st2	0.743818	6.86179	5.29893	4.33891e-05	0.000261209	1.65443
Pcdhb7	-0.643948	6.60248	-5.29708	4.35647e-05	0.0002619	1.65035
Gm20754	-0.797721	6.62303	-5.29121	4.41263e-05	0.00026461	1.6374
Qpct	-0.634452	6.35607	-5.2843	4.47962e-05	0.000267955	1.62217
Ano3	-1.63014	7.38181	-5.28378	4.48475e-05	0.000268113	1.62101
Hpdl	-0.696043	5.01415	-5.28205	4.50167e-05	0.0002689	1.6172
Prkx	0.895505	6.61666	5.27502	4.57135e-05	0.000272457	1.60167
Lonrf1	0.849477	9.28018	5.27084	4.61325e-05	0.000274574	1.59245
Jph4	-0.801011	9.78753	-5.2688	4.63381e-05	0.000275722	1.58795
Ranbp2	0.858046	7.62418	5.25339	4.79243e-05	0.000283825	1.55394
Ampd3	0.929774	8.35991	5.24465	4.88493e-05	0.000288588	1.53461
D9Ertd292e	-1.07178	5.02721	-5.24445	4.88703e-05	0.000288632	1.53418
Mettl8	-0.645593	5.80715	-5.23136	5.02892e-05	0.000295552	1.50525
Cyba	0.93591	7.4717	5.21816	5.17637e-05	0.000302976	1.47605
B230334C09Rik	-0.608729	4.91504	-5.21431	5.22019e-05	0.000305126	1.46753
Rhbdl1	-0.687849	8.27173	-5.21315	5.23341e-05	0.000305816	1.46498
Tmem14a	-0.766641	8.70321	-5.21283	5.23714e-05	0.000305889	1.46426
Irgm1	0.874769	7.80574	5.2121	5.24551e-05	0.000306189	1.46265
Arf2	0.708765	6.8124	5.21088	5.25954e-05	0.000306759	1.45995
Fstl5	-0.705508	6.9972	-5.19961	5.39091e-05	0.000313486	1.43502
P2ry14	-0.637919	4.54509	-5.19825	5.40709e-05	0.000314087	1.432
Ecm1	0.883153	6.57484	5.1978	5.41238e-05	0.00031431	1.43101
Casp8	0.819681	6.06848	5.19116	5.49173e-05	0.000317973	1.4163
Sdc1	0.682793	4.48948	5.18247	5.59729e-05	0.000323128	1.39707
Fndc5	-0.824318	7.37902	-5.18139	5.61056e-05	0.000323547	1.39468
Chst9	-0.989759	3.36366	-5.18125	5.61234e-05	0.000323563	1.39436
Matk	-0.779916	8.49052	-5.17965	5.63204e-05	0.000324438	1.39082
Rasal1	-0.717926	7.62506	-5.17616	5.67538e-05	0.000326442	1.38308
Wdr35	-0.592599	6.67106	-5.17584	5.67929e-05	0.000326491	1.38238
Sall2	-0.680104	7.4397	-5.16953	5.75852e-05	0.000330133	1.36839
Rhbdf1	0.677995	7.73615	5.16903	5.76473e-05	0.000330312	1.3673
Slc44a3	1.01267	3.90011	5.16371	5.83245e-05	0.000333216	1.35551
Sox18	0.609001	7.22221	5.16271	5.84531e-05	0.000333863	1.35328
A730035I17Rik	0.710738	4.39237	5.15999	5.88035e-05	0.000335508	1.34725
Slc27a3	-0.637504	5.49864	-5.15691	5.92021e-05	0.000337603	1.34042
Tyrobp	0.816035	8.76899	5.14613	6.06199e-05	0.000344409	1.31652
Cnih2	-0.611994	10.6627	-5.13462	6.21728e-05	0.000351283	1.29098
Fhad1	0.777602	6.83704	5.12477	6.35336e-05	0.000357844	1.26912
Sh3bp2	0.780595	5.74742	5.12314	6.3761e-05	0.000358843	1.26552
B930012P20Rik	-0.595454	5.73839	-5.10975	6.56672e-05	0.000368222	1.23578
Zfp948	0.668942	5.61856	5.10842	6.58584e-05	0.000369006	1.23285
Nov	-0.67199	9.00288	-5.10605	6.62031e-05	0.000370551	1.22758
Stmn2	-0.590539	10.4943	-5.09523	6.77985e-05	0.000378259	1.20354
C030005H24Rik	-0.618024	5.09456	-5.08793	6.88976e-05	0.000383636	1.18731
Gm10791	0.745792	3.88794	5.08441	6.94324e-05	0.000386214	1.17951
Cxcl2	1.34083	3.87968	5.08168	6.98518e-05	0.000388046	1.17343
Parp12	0.747243	7.33716	5.07766	7.04727e-05	0.00039099	1.1645
Plagl1	0.916301	7.19099	5.07554	7.08032e-05	0.000392621	1.15978
Zfp551	-0.708593	5.29268	-5.07059	7.15797e-05	0.000396212	1.14877
Cdc25b	-0.677577	5.92569	-5.06592	7.23204e-05	0.000399842	1.13838
Ifi35	0.639275	6.23844	5.06317	7.27595e-05	0.000401709	1.13228
Sdc4	0.596928	7.69753	5.05936	7.3374e-05	0.000404133	1.12379
Nkx6-2	0.664352	5.50566	5.05727	7.37117e-05	0.000405509	1.11916
Ddx39	0.714811	7.03866	5.05595	7.39273e-05	0.000406383	1.11621
Fezf2	0.835352	8.57943	5.05392	7.4259e-05	0.000407894	1.11169
Tef	-0.630116	7.29364	-5.05184	7.46007e-05	0.000409352	1.10706
Rasd2	-0.878215	7.73981	-5.05107	7.47267e-05	0.000409835	1.10536
Col10a1	1.15842	4.74528	5.04669	7.54534e-05	0.000413504	1.0956
Tspan4	0.864835	7.57049	5.04147	7.63268e-05	0.000417758	1.08399
1810010H24Rik	-0.622713	5.06281	-5.03927	7.66973e-05	0.000419466	1.0791
Muc2	0.632813	4.36851	5.02851	7.85404e-05	0.000428783	1.05515
Gabrb3	-0.815935	9.2856	-5.02656	7.88798e-05	0.00043009	1.0508
Ar	-0.634703	6.54649	-5.02021	7.99941e-05	0.000435172	1.03665
Camkv	-0.662107	10.5375	-5.01935	8.01455e-05	0.000435562	1.03474
Gdpgp1	-0.643981	5.18393	-5.01657	8.06401e-05	0.000437912	1.02854
Pcdhb9	-0.625028	7.55622	-5.01097	8.1643e-05	0.000442242	1.01607
Fermt3	0.630569	5.20235	4.99801	8.40156e-05	0.000452472	0.987188
Cirbp	-0.795474	7.93226	-4.9852	8.64288e-05	0.000464306	0.958636
9830166K06Rik	0.740429	5.77563	4.97759	8.78961e-05	0.000471483	0.941663
A130012E19Rik	0.813557	6.4818	4.97685	8.80407e-05	0.000471905	0.940007
Wnt9a	-0.58739	4.55019	-4.97245	8.89008e-05	0.000475567	0.930206
Gm33298	0.834928	7.28136	4.96439	9.05021e-05	0.000482932	0.912211
Serpinb2	2.91079	3.80287	4.95996	9.13943e-05	0.000486969	0.902323
Itgb2	0.871681	6.24946	4.95443	9.25192e-05	0.000491504	0.889994
Ina	0.645012	10.7087	4.94902	9.36344e-05	0.000496567	0.877918
P2ry13	-0.643984	6.382	-4.94633	9.41935e-05	0.00049904	0.871918
Lcp1	0.788589	6.63231	4.94504	9.44641e-05	0.000500227	0.869027
Slc35f1	-0.61842	6.15782	-4.94421	9.46383e-05	0.000500903	0.86717
Sgms2	1.15491	5.55916	4.94355	9.47761e-05	0.000501386	0.865704
Ifitm3	0.966197	9.59232	4.94095	9.53243e-05	0.000504038	0.859891
Cav1	0.833497	8.12656	4.93938	9.56561e-05	0.000505668	0.856391
Tagln	0.660607	6.97249	4.93827	9.5892e-05	0.00050679	0.853909
Wdr47	-0.675291	8.25892	-4.93564	9.64514e-05	0.000509246	0.848046
Cadm2	-0.720802	8.70038	-4.93113	9.74199e-05	0.000513352	0.837979
LOC102641289	-0.783791	7.11482	-4.90931	0.00010225	0.000535392	0.78923
Actl6b	-0.606642	8.60076	-4.90542	0.000103136	0.000539637	0.780538
Plp2	0.5951	7.26825	4.89401	0.000105782	0.000552005	0.755021
Slc17a7	-0.60263	10.2156	-4.89183	0.000106294	0.00055414	0.750155
Ms4a6b	1.02776	4.78429	4.88479	0.00010797	0.000560973	0.734401
Adra2a	0.609551	5.57409	4.87892	0.000109384	0.000567091	0.721291
Tm4sf1	1.41414	6.574	4.87866	0.00010945	0.000567292	0.720691
F2r	0.684868	6.7737	4.87578	0.00011015	0.000570509	0.714268
Kcnab2	-1.14574	9.928	-4.86991	0.000111598	0.000577035	0.701119
6330406O05Rik	-0.613312	5.40634	-4.86871	0.000111894	0.000578289	0.69845
Zfp184	0.602705	4.38512	4.86757	0.000112178	0.000579339	0.695897
Rph3a	-0.647004	8.37652	-4.86638	0.000112476	0.0005806	0.693225
C230021G24Rik	0.8052	4.64676	4.86232	0.000113496	0.000585022	0.684136
4921511C10Rik	-0.732985	4.78146	-4.85776	0.00011465	0.000590545	0.673953
Rasd1	0.89689	8.96977	4.85356	0.000115725	0.000595231	0.66455
Tmem119	-0.58713	6.84485	-4.83718	0.00012002	0.000614234	0.627871
Thbs4	1.21079	8.19456	4.83068	0.000121768	0.000621654	0.613317
Shisa2	0.832395	4.72258	4.82715	0.000122727	0.000625556	0.605424
Krt75	1.52477	6.29792	4.82325	0.000123797	0.000630117	0.596683
5031426D15Rik	-0.66798	5.28884	-4.8227	0.000123948	0.000630736	0.595456
Trhde	-0.653863	7.21735	-4.81958	0.000124814	0.000634393	0.588448
Islr2	-0.635591	6.63273	-4.81418	0.000126323	0.000640702	0.576352
C330027C09Rik	0.702043	4.48834	4.80682	0.00012841	0.000649293	0.559869
Nrip3	-0.6391	8.31227	-4.80426	0.000129144	0.000652395	0.554128
Trim25	0.738046	5.77842	4.79975	0.000130447	0.000658203	0.544029
Gpx3	1.11225	6.87357	4.78981	0.000133369	0.000671528	0.521743
Hn1l	0.949556	5.96963	4.77994	0.000136334	0.000683578	0.499622
A630081D01Rik	0.629516	7.20196	4.77735	0.000137124	0.000686911	0.493813
Epha3	-0.774661	5.69643	-4.77389	0.000138185	0.000690926	0.486058
Drd1	0.693932	6.17258	4.76885	0.000139747	0.00069776	0.474757
Rgs7	0.966503	9.94833	4.76235	0.000141788	0.000707295	0.460173
Cybb	0.600886	3.73943	4.7588	0.000142916	0.00071193	0.452206
Parp9	0.905271	6.00522	4.75761	0.000143295	0.000713488	0.449541
Tnfsf9	0.59894	4.51216	4.74967	0.000145858	0.000723737	0.431714
Dlx1	-0.740297	5.79507	-4.74487	0.000147426	0.000730001	0.420963
Ifitm1	0.754622	7.90277	4.74266	0.000148156	0.000732945	0.415991
Upp1	0.726872	5.82917	4.739	0.000149371	0.000737765	0.407784
S100a9	0.806298	5.19042	4.73793	0.000149729	0.000739197	0.405373
Arr3	0.593472	4.73633	4.73083	0.000152121	0.000748768	0.389444
Flnc	0.865803	6.6577	4.70637	0.000160665	0.000784363	0.334515
Csrp2	0.822393	6.97478	4.69736	0.000163932	0.000798178	0.314283
Spink8	-1.07638	8.03709	-4.69734	0.00016394	0.000798178	0.314236
Alas2	0.625804	6.33843	4.6964	0.000164284	0.000799489	0.312132
Hspb6	1.12112	7.40286	4.69579	0.000164507	0.000800214	0.310767
Ptx3	0.913838	6.05345	4.69174	0.000166003	0.000806577	0.301673
Ccdc138	1.14086	6.01346	4.67397	0.000172733	0.00083519	0.261744
Ankrd45	-0.794801	6.16681	-4.67184	0.000173561	0.000838292	0.256941
Cwc25	1.1862	6.79316	4.67012	0.000174227	0.00084046	0.253094
9130221J17Rik	0.592999	5.97996	4.66924	0.000174572	0.00084194	0.251102
Ap1s3	0.734629	4.41328	4.66902	0.000174656	0.000842154	0.250622
Penk	1.33278	8.8515	4.65895	0.00017864	0.000858476	0.227969
Plpp4	0.875037	5.98922	4.64813	0.000183018	0.00087736	0.20365
1500009C09Rik	-0.722056	6.61092	-4.6459	0.000183935	0.000881168	0.19863
Clec5a	0.871081	4.36929	4.63547	0.000188279	0.000899177	0.175189
Aspg	1.05397	6.56453	4.61414	0.000197495	0.00093736	0.127216
Rerg	-0.99027	6.02498	-4.59758	0.000204964	0.000967684	0.0899584
Glis3	0.869487	6.69637	4.59721	0.000205137	0.000968183	0.0891093
Pglyrp1	1.41292	7.6792	4.59021	0.00020838	0.000980798	0.0733717
Iyd	-1.07727	5.87672	-4.58774	0.000209541	0.000986047	0.0677963
Chsy1	0.595643	8.31279	4.57429	0.000215957	0.00101181	0.0375352
Car11	-0.588666	9.50074	-4.57075	0.000217678	0.00101854	0.0295723
Prrt2	-0.719845	9.17108	-4.56168	0.000222158	0.00103613	0.00913525
Cth	0.619904	5.68582	4.55082	0.000227639	0.00105794	-0.0153095
Cntnap2	-0.771089	6.71535	-4.54989	0.000228113	0.00105976	-0.0173948
Prkcg	-1.06054	10.0767	-4.54428	0.000231008	0.00107044	-0.0300445
Fibcd1	-0.893653	7.24882	-4.54179	0.0002323	0.00107583	-0.0356349
1190002N15Rik	0.654393	7.16159	4.5405	0.000232975	0.00107747	-0.0385464
Pdpn	0.821313	8.31062	4.52629	0.000240534	0.00110837	-0.070561
Atoh7	0.649167	5.51154	4.48019	0.000266797	0.00121097	-0.17442
Heca	0.735734	8.11873	4.4722	0.000271636	0.00122956	-0.192428
D130062J21Rik	0.912702	5.97523	4.47016	0.000272885	0.00123418	-0.197025
Nupr1	1.16908	6.67847	4.44527	0.000288609	0.00129306	-0.253134
Emp3	0.869237	5.61225	4.44293	0.00029013	0.00129924	-0.258397
Adcy1	-0.64524	9.58233	-4.44071	0.000291584	0.00130418	-0.263405
Nmi	0.67513	6.22362	4.4405	0.000291726	0.00130431	-0.26389
Tspo	1.0582	6.57013	4.4368	0.000294164	0.0013133	-0.272224
Vamp8	0.734315	8.01154	4.43107	0.000297987	0.00132761	-0.285151
Arrdc2	0.828156	6.61291	4.42844	0.000299758	0.00133495	-0.291083
Lrrc3b	-0.772077	6.34161	-4.4258	0.000301544	0.00134207	-0.297031
D10Ertd709e	0.88559	5.60893	4.41452	0.000309307	0.00137377	-0.322475
6720420G18Rik	0.850313	5.2916	4.40475	0.00031619	0.0014003	-0.344502
Vamp1	-0.797348	7.6711	-4.39865	0.000320565	0.00141803	-0.358254
F630007L15Rik	0.994805	5.16926	4.38205	0.000332786	0.00146595	-0.395687
6330563C09Rik	-0.61184	6.06496	-4.36394	0.000346657	0.00151989	-0.436535
Sh2d5	0.714103	7.50655	4.36305	0.000347355	0.00152171	-0.438547
Nckap1l	0.644579	6.07494	4.3537	0.000354761	0.00154911	-0.459643
Peli1	0.659811	6.22974	4.35302	0.000355304	0.00155022	-0.461174
Fkbp1b	-0.688541	8.13903	-4.34527	0.000361566	0.00157435	-0.478643
Cd44	1.54582	6.13345	4.3421	0.000364163	0.00158437	-0.485796
Spidr	0.849123	5.83489	4.32781	0.000376096	0.00162937	-0.518028
Dkk3	-0.626325	9.70824	-4.32454	0.000378884	0.00163947	-0.52541
9930017N22Rik	1.06143	6.53048	4.31558	0.000386627	0.00166493	-0.545629
Sh3gl2	-0.735489	9.75891	-4.3137	0.000388272	0.00167102	-0.549872
Fcer1g	0.768139	7.86014	4.30351	0.000397308	0.00170479	-0.572858
Exoc6b	-0.709216	7.32243	-4.30253	0.000398188	0.00170788	-0.575068
S100a8	0.903548	5.69673	4.30009	0.000400383	0.0017156	-0.580562
Dmkn	0.736434	4.28637	4.29644	0.000403701	0.00172842	-0.588805
Col16a1	0.80402	6.79693	4.29015	0.000409479	0.00174968	-0.603001
Trim30a	1.15954	5.8257	4.2693	0.000429225	0.00182067	-0.650036
Timp1	1.83538	7.35384	4.26087	0.000437478	0.0018513	-0.669054
C030004G16Rik	0.70975	3.72552	4.24659	0.000451829	0.0019023	-0.701273
C1qb	0.589615	8.80387	4.23431	0.00046454	0.00194819	-0.728964
Irf9	0.77767	6.44819	4.22419	0.000475287	0.00198574	-0.751786
Elovl7	0.719281	6.37811	4.20975	0.000491067	0.00204153	-0.784369
Sprr1a	1.23558	5.11798	4.20501	0.000496364	0.00206235	-0.795071
Slc14a1	0.876471	7.45782	4.19539	0.000507276	0.00210119	-0.816757
Emcn	0.719109	6.43775	4.1845	0.000519932	0.00214494	-0.84133
Homer1	0.809639	7.63428	4.17431	0.000532054	0.00218531	-0.864307
Pik3ip1	-0.675494	7.22847	-4.16625	0.000541841	0.00222169	-0.882476
Mir675	1.04787	4.50046	4.15277	0.00055863	0.00227751	-0.912886
9430064K01Rik	0.617431	7.51134	4.13945	0.000575717	0.00233654	-0.942903
Tmem98	0.656339	8.64301	4.13335	0.000583726	0.00236147	-0.956666
Parp3	0.743552	5.78061	4.13238	0.000585013	0.00236623	-0.958859
AI464131	-0.854689	6.92072	-4.12736	0.000591693	0.00238831	-0.970167
Abca5	0.739084	7.5038	4.11675	0.000606072	0.00243903	-0.99408
Naip2	0.648452	3.98722	4.1061	0.000620868	0.00248926	-1.01809
Gdf10	-0.803472	6.52661	-4.07954	0.000659354	0.00262043	-1.07795
F13a1	0.657066	6.07159	4.06473	0.000681844	0.00269208	-1.11132
Ppp1r3b	0.704196	5.15548	4.0575	0.000693096	0.0027275	-1.1276
Popdc3	0.600052	6.91619	4.05502	0.000696993	0.00274083	-1.13318
3110070M22Rik	1.33056	4.43436	4.05188	0.000701978	0.00275539	-1.14027
Ifi202b	1.03346	3.15784	4.04295	0.00071631	0.00280499	-1.16037
C130057M05Rik	0.826996	7.51216	4.03931	0.000722247	0.00282516	-1.16857
Zbed5	-0.592384	5.95313	-4.03515	0.000729086	0.00284983	-1.17794
Krt73	-0.608157	6.09008	-4.02878	0.000739689	0.00288613	-1.19229
Txnip	0.772567	7.78099	4.02818	0.000740678	0.00288937	-1.19362
Rhox4b	0.620689	8.37102	4.02728	0.000742198	0.0028937	-1.19566
Slc38a5	-0.718382	6.2269	-4.02722	0.000742297	0.0028937	-1.19579
Mdfic	0.987916	7.65549	4.00601	0.000778836	0.0030158	-1.24355
1700048F04Rik	0.77703	4.92913	4.00313	0.00078394	0.00303011	-1.25004
Cadps2	-0.754814	9.3904	-3.99242	0.000803187	0.00309117	-1.27413
Pgm2l1	-0.613194	9.82533	-3.99185	0.000804219	0.00309459	-1.27541
Gm2832	0.625874	4.03344	3.98315	0.000820238	0.00315003	-1.29499
Serpinf2	0.816012	6.03433	3.96837	0.000848164	0.00324511	-1.32824
Hhipl2	1.14864	3.98598	3.96224	0.000860022	0.00328464	-1.34202
Cpn1	0.800081	4.19565	3.95968	0.000865034	0.00330085	-1.34779
Lix1	-0.800842	7.59868	-3.94991	0.000884398	0.00336102	-1.36976
Cabp7	-0.95735	8.76481	-3.94827	0.000887696	0.00337118	-1.37345
Mlf1	0.980154	5.1174	3.93552	0.000913699	0.00345407	-1.4021
Ahi1	-0.677901	8.38137	-3.93086	0.000923407	0.00348709	-1.41258
Hlf	-0.624925	8.1748	-3.92965	0.000925935	0.00349541	-1.41529
Ubtfl1	0.778255	2.71132	3.92583	0.000933988	0.00351964	-1.42388
Msr1	0.734385	4.87081	3.89632	0.000998571	0.00372774	-1.49018
Gfap	0.765204	10.568	3.87722	0.00104273	0.00386977	-1.53306
Perp	1.00494	6.77196	3.86656	0.00106823	0.00394942	-1.557
Aldh1a2	0.657333	7.48558	3.85401	0.00109902	0.00405349	-1.58514
Manf	0.639434	9.43398	3.8519	0.0011043	0.00406876	-1.58988
Cdk14	-1.00295	8.15508	-3.85039	0.00110808	0.00408129	-1.59326
Mturn	-0.589871	6.79865	-3.83871	0.00113779	0.00417688	-1.61946
Gimap8	0.739025	5.388	3.82732	0.00116754	0.00427032	-1.64501
Stab1	0.640095	6.19659	3.81537	0.00119957	0.00437483	-1.67179
Frzb	-0.75297	6.42434	-3.80803	0.00121966	0.00443009	-1.68822
Kcnq3	-0.616904	6.10725	-3.80337	0.00123262	0.00446815	-1.69867
Serpina3n	1.2268	9.63625	3.79955	0.00124333	0.00450237	-1.70723
Serpina3m	0.750346	3.58811	3.7983	0.00124684	0.00451354	-1.71001
Fcrls	0.770823	8.10659	3.79819	0.00124715	0.0045139	-1.71026
Tnnc2	0.811892	4.01317	3.79148	0.00126626	0.00457156	-1.72529
A2m	0.889826	7.49189	3.77757	0.00130676	0.00470042	-1.75642
Fgfbp3	0.67757	6.44771	3.76966	0.0013304	0.00477106	-1.77414
Loxl1	0.634684	5.45639	3.7647	0.00134541	0.00481768	-1.78523
LOC100044068	1.3218	3.01554	3.74917	0.00139354	0.00497239	-1.81995
Syt1	-0.74401	9.73196	-3.74412	0.00140958	0.00502322	-1.83125
Piga	0.606042	5.82806	3.7297	0.00145634	0.00516842	-1.86347
Rab26	-0.657374	7.42619	-3.72551	0.00147023	0.00520485	-1.87285
Tmem114	0.764276	7.08855	3.6978	0.00156536	0.00549817	-1.93471
Slc31a1	0.659235	7.10996	3.6819	0.00162267	0.00567078	-1.97017
Islr	-0.587866	7.53251	-3.67925	0.00163244	0.00570215	-1.97609
Rps27l	0.621513	8.99469	3.66127	0.00170015	0.00590548	-2.01615
2900097C17Rik	-0.620431	8.25638	-3.65256	0.00173398	0.00600319	-2.03556
Gm35491	-0.603236	5.15782	-3.64758	0.00175361	0.00606432	-2.04665
Akr1b8	1.06345	6.26089	3.64208	0.00177556	0.00612646	-2.05891
Chrna1	0.791725	5.3376	3.61563	0.0018849	0.00644991	-2.11774
Nlrc5	0.751654	3.92886	3.59977	0.00195368	0.00665144	-2.15301
Clcf1	1.11961	4.93137	3.58634	0.00201382	0.00682592	-2.18283
Chil1	0.883708	6.34378	3.57812	0.00205154	0.00693191	-2.20107
Pon3	0.662941	4.43179	3.5727	0.00207681	0.00700191	-2.21311
Arhgdib	0.684591	7.70921	3.5646	0.00211513	0.00711603	-2.23108
D11Ertd80e	-0.778336	5.10156	-3.55765	0.00214856	0.00721104	-2.24649
Rbp1	0.710771	8.41661	3.55522	0.00216035	0.00724382	-2.25186
Gpr34	-0.932731	5.50949	-3.55266	0.00217287	0.00728223	-2.25754
Gm13306	-0.586319	6.18492	-3.5526	0.00217316	0.00728223	-2.25767
Medag	0.600354	5.12265	3.53974	0.00223712	0.00746402	-2.28617
Tgm1	1.91252	5.63503	3.53365	0.00226809	0.00755212	-2.29967
Slc16a6	0.608024	5.02239	3.53273	0.00227277	0.00756302	-2.30169
Gm19935	0.611382	7.07941	3.52154	0.00233089	0.00772533	-2.32648
AI607873	0.947761	2.80943	3.51101	0.00238684	0.00788043	-2.34976
C4a	0.67183	8.58361	3.50613	0.00241327	0.00796035	-2.36056
S100a6	0.934561	7.85844	3.48011	0.00255894	0.00836136	-2.41803
Slc37a2	0.610819	5.2694	3.44916	0.00274357	0.00887431	-2.48629
Creld2	0.665973	7.64926	3.43782	0.00281448	0.0090696	-2.51128
S1pr3	1.22179	7.16571	3.40424	0.00303517	0.00968236	-2.58514
Cenpa	0.724319	4.31808	3.40416	0.0030357	0.00968236	-2.58531
9930031P18Rik	0.670724	7.73539	3.39312	0.00311191	0.00989931	-2.60955
Rsad2	0.838787	5.082	3.38096	0.00319806	0.0101352	-2.63624
Klk8	-0.616101	7.64317	-3.37375	0.00325026	0.0102738	-2.65205
Igtp	0.919196	7.4177	3.35908	0.00335902	0.010554	-2.6842
Dlx1as	-0.884492	6.06922	-3.33951	0.00350973	0.0109618	-2.72704
6430604M11Rik	-0.607397	5.76055	-3.33925	0.00351171	0.0109665	-2.72759
Eda2r	0.59291	3.45632	3.31501	0.0037077	0.0115067	-2.78055
Tgtp2	0.60699	6.66512	3.31102	0.00374102	0.0115917	-2.78927
AA467197	1.11999	4.59158	3.30638	0.00378006	0.0116924	-2.79939
Tslp	0.908814	3.18897	3.27468	0.00405783	0.0124407	-2.86846
Slfn8	0.638943	4.43917	3.25073	0.00428085	0.0130205	-2.92052
Atp11c	0.695257	5.86854	3.24822	0.00430491	0.0130844	-2.92597
Baiap2l1	0.667711	5.16108	3.22458	0.00453814	0.0136927	-2.97726
Tmx4	-0.636718	8.46164	-3.19297	0.00486929	0.0145369	-3.04565
2810043O03Rik	0.774688	7.02387	3.18245	0.00498471	0.01483	-3.06837
Gm19439	0.688918	7.92728	3.18034	0.00500823	0.0148938	-3.07294
Nop58	0.630277	6.69721	3.1733	0.00508725	0.0150934	-3.08812
Apod	0.693234	9.11966	3.13038	0.0055962	0.0163931	-3.1805
AU020206	0.642879	5.88169	3.11	0.00585501	0.0170155	-3.22424
Plscr2	0.740888	3.64395	3.08609	0.00617347	0.0178079	-3.27544
Cox6b2	0.62524	5.78519	3.06201	0.00651118	0.0186095	-3.32687
Lrtm2	0.668384	8.47661	3.06131	0.00652129	0.018631	-3.32837
Trpc5	-0.629961	5.37049	-3.04187	0.00680742	0.0193474	-3.36979
Ifit1	1.10746	5.42261	3.03093	0.00697365	0.0197711	-3.39305
Steap1	1.55876	6.61808	3.01598	0.00720744	0.0203641	-3.42483
Plin4	0.734415	6.74067	3.01284	0.00725743	0.0204812	-3.43148
Pyhin1	0.732923	3.63983	2.95299	0.00827803	0.0228987	-3.55802
Npy	0.798786	10.3997	2.94352	0.00845171	0.0232994	-3.57796
Slc4a2	0.747234	7.95954	2.9421	0.00847807	0.023356	-3.58094
Fxyd7	-0.638677	8.07364	-2.93384	0.00863303	0.02371	-3.59833
Mnda	0.809063	4.31496	2.89202	0.00946002	0.0256308	-3.686
Nell2	-0.623085	9.26721	-2.84051	0.0105837	0.0282521	-3.79332
4833427G06Rik	0.699002	3.8749	2.83631	0.0106808	0.0284616	-3.80204
Isg15	0.858938	5.54899	2.82287	0.0109972	0.0292037	-3.8299
Trim30d	0.5987	4.42794	2.81249	0.0112478	0.0297406	-3.85139
Chil3	0.828442	3.54905	2.76211	0.0125436	0.03263	-3.9552
Bst2	0.59958	6.34345	2.7524	0.0128091	0.0332236	-3.97511
Abca4	0.815413	6.99017	2.74874	0.0129106	0.0334466	-3.98261
Ifi204	1.03656	2.84837	2.73787	0.0132166	0.0341039	-4.00486
Cd72	0.687357	5.08593	2.68009	0.0149633	0.0378681	-4.1225
Cxcl10	1.48895	6.57585	2.65743	0.0157066	0.0395006	-4.16834
Rdh5	0.621878	7.95044	2.56476	0.0191273	0.0466321	-4.35394
Lbp	0.629278	6.34232	2.56331	0.019186	0.0467549	-4.35682
Pcolce	0.718842	6.9313	2.5512	0.0196831	0.0478076	-4.38083
Fam198b	0.645189	4.42676	2.51083	0.0214304	0.0514244	-4.46051
Krt18	1.17729	5.81751	2.43116	0.0253141	0.0592562	-4.61586
Ifit3	0.853664	7.13172	2.42709	0.0255293	0.0596756	-4.62373
Usp18	1.08383	5.45727	2.40945	0.0264817	0.0615873	-4.65776
Ace	0.603386	7.14786	2.34923	0.029988	0.0682584	-4.77292
Oasl2	0.798148	5.435	2.30064	0.0331269	0.0740321	-4.86469
Pcolce2	0.800345	7.35524	2.29019	0.0338407	0.0753143	-4.88429
Col8a2	1.07285	5.68946	2.28259	0.0343688	0.0763317	-4.89851
Col8a1	0.887894	5.5101	2.24793	0.0368739	0.0810336	-4.96303
Igfbp2	0.718899	8.54281	2.21089	0.0397366	0.0863049	-5.03136
Oca2	0.618158	5.83196	2.17518	0.0426872	0.0915272	-5.09659
Wfdc2	0.802161	6.09082	2.16048	0.0439594	0.0937691	-5.12326
Slc13a4	0.754853	7.75296	2.13973	0.0458137	0.0970985	-5.16073
